# Supplementary material for: Modified Rice Bran Arabinoxylan as a Nutraceutical in Health and Disease – A Scoping Review with Bibliometric Analysis
Source: Preprints.org preprint supplement (doi:10.20944/preprints202304.1154.v1), 2023-04-28
Supplement: Supplementary file 1 [file supplementary]

|                                      |    |
|--------------------------------------|----|
| S1. Supporting Materials for Methods | 2  |
| S2. PRISMA-ScR Checklist             | 6  |
| S3. Data Tables                      | 8  |
| S4. Additional Tables and Figures    | 11 |
| S5. Additional References            | 42 |

## S1. Supporting Materials for Methods

### S1.1 Search strategy example

#### **Name of the information source and the platform/service provider used**

MEDLINE (via PubMed)

**All the search terms to be used (both keywords/text words and index terms should be included) and how they are to be combined using Boolean logic; the use of truncation and wildcards.**

((Modified) OR (Hydroly\*) OR (Fermented) OR (Bioprocessed)) AND (Rice Bran) AND ((arabinoxylan) OR (hemicellulose) OR (polysaccharide) OR (Exo-biopolymer))

OR

((Biobran) OR (MGN-3) OR (Ribraxx) OR (BRM4) OR (RBEP))

#### **Planned limits (date, language, etc.)**

MEDLINE - No limit

#### **Search Conducted On**

27 September 2022

#### **Number of Records**

207

#### **Detail Query**

((("modifiable"[All Fields] OR "modified"[All Fields] OR "modifier"[All Fields] OR "modifiers"[All Fields] OR "modifies"[All Fields] OR "modify"[All Fields] OR "modifying"[All Fields] OR "hydroly\*" [All Fields] OR ("ferment"[All Fields] OR "fermentabilities"[All Fields] OR "fermentability"[All Fields] OR "fermentable"[All Fields] OR "fermentate"[All Fields] OR "fermentated"[All Fields] OR "fermentates"[All Fields] OR "fermentation"[MeSH Terms] OR "fermentation"[All Fields] OR "fermentations"[All Fields] OR "fermentative"[All Fields] OR "fermentatively"[All Fields] OR "fermentator"[All Fields] OR "fermented"[All Fields] OR "fermenter"[All Fields] OR "fermenters"[All Fields] OR "fermenting"[All Fields] OR "fermentation"[All Fields] OR "ferments"[All Fields]) OR "Bioprocessed"[All Fields]) AND (("oryza"[MeSH Terms] OR "oryza"[All Fields] OR "rice"[All Fields]) AND "Bran"[All Fields]) AND ("arabinoxylan"[Supplementary Concept] OR "arabinoxylan"[All Fields] OR "arabinoxylans"[All Fields] OR ("hemicellulose"[Supplementary Concept] OR "hemicellulose"[All Fields] OR "hemicelluloses"[All Fields] OR "hemicellulosic"[All Fields]) OR ("polysaccharid"[All Fields] OR "polysaccharide s"[All Fields] OR "polysaccharides"[MeSH Terms] OR "polysaccharides"[All Fields] OR "polysaccharide"[All Fields] OR "polysaccharidic"[All Fields] OR "polysaccharids"[All Fields]) OR "Exo-biopolymer"[All Fields])) OR ("polysaccharide mgn3"[Supplementary Concept] OR

"polysaccharide mgn3"[All Fields] OR "biobran"[All Fields] OR ("polysaccharide mgn3"[Supplementary Concept] OR "polysaccharide mgn3"[All Fields] OR "mgn 3"[All Fields]) OR "Ribraxx"[All Fields] OR "BRM4"[All Fields] OR "RBEP"[All Fields])

#### Translations

Modified: "modifiable"[All Fields] OR "modified"[All Fields] OR "modifier"[All Fields] OR "modifiers"[All Fields] OR "modifies"[All Fields] OR "modify"[All Fields] OR "modifying"[All Fields]

Fermented: "ferment"[All Fields] OR "fermentabilities"[All Fields] OR "fermentability"[All Fields] OR "fermentable"[All Fields] OR "fermentate"[All Fields] OR "fermentated"[All Fields] OR "fermentates"[All Fields] OR "fermentation"[MeSH Terms] OR "fermentation"[All Fields] OR "fermentations"[All Fields] OR "fermentative"[All Fields] OR "fermentatively"[All Fields] OR "fermentator"[All Fields] OR "fermented"[All Fields] OR "fermenter"[All Fields] OR "fermenters"[All Fields] OR "fermenting"[All Fields] OR "fermentation"[All Fields] OR "ferments"[All Fields]

Rice: "oryza"[MeSH Terms] OR "oryza"[All Fields] OR "rice"[All Fields]

arabinoxylan: "arabinoxylan"[Supplementary Concept] OR "arabinoxylan"[All Fields] OR "arabinoxylans"[All Fields]

hemicellulose: "hemicellulose"[Supplementary Concept] OR "hemicellulose"[All Fields] OR "hemicelluloses"[All Fields] OR "hemicellulosic"[All Fields]

polysaccharide: "polysaccharid"[All Fields] OR "polysaccharide's"[All Fields] OR "polysaccharides"[MeSH Terms] OR "polysaccharides"[All Fields] OR "polysaccharide"[All Fields] OR "polysaccharidic"[All Fields] OR "polysaccharids"[All Fields]

Biobran: "polysaccharide MGN3"[Supplementary Concept] OR "polysaccharide MGN3"[All Fields] OR "biobran"[All Fields]

MGN-3: "polysaccharide MGN3"[Supplementary Concept] OR "polysaccharide MGN3"[All Fields] OR "mgn 3"[All Fields]

### S 1.2. Data extraction instrument

|                                                                |                                                                                                                                                                                                                                                                                                                                                                                                                                |
|----------------------------------------------------------------|--------------------------------------------------------------------------------------------------------------------------------------------------------------------------------------------------------------------------------------------------------------------------------------------------------------------------------------------------------------------------------------------------------------------------------|
| <i>Citation details (APA 7<sup>th</sup>)</i>                   |                                                                                                                                                                                                                                                                                                                                                                                                                                |
| <i>Country</i>                                                 |                                                                                                                                                                                                                                                                                                                                                                                                                                |
| <i>Article Type</i>                                            | Full paper, short communication, abstract only, thesis, book chapter, study protocol, trial registration.                                                                                                                                                                                                                                                                                                                      |
| <i>Study Type</i>                                              | Human / Animal / In vitro / Others<br><br><i>Human: Randomized controlled trials, non-randomized controlled trials, before and after studies and interrupted time-series studies, prospective or retrospective cohort studies, case-control studies, analytical cross-sectional studies, case series, individual case reports and descriptive cross-sectional studies.</i><br><br><i>Trial registration (Human trial only)</i> |
| <i>Context</i>                                                 | <i>Human: Population, sex, age, sample size, health/disease conditions.</i><br><i>Animal: Type, sex, age, sample size, health/disease conditions.</i><br><i>In vitro: Cell lines</i>                                                                                                                                                                                                                                           |
| <i>Methodology / methods</i>                                   |                                                                                                                                                                                                                                                                                                                                                                                                                                |
| <i>Intervention &amp; comparator</i>                           | <i>If applicable, include duration, dosage, mode of administration.</i>                                                                                                                                                                                                                                                                                                                                                        |
| <i>Outcome measures</i>                                        |                                                                                                                                                                                                                                                                                                                                                                                                                                |
| <i>Key findings that relate to the scoping review question</i> |                                                                                                                                                                                                                                                                                                                                                                                                                                |

### S1.3. Co-author weight coefficient scheme

The following formula is used to attribute the weight coefficient  $c(k,n)$ , where  $n$  = number of authors,  $k$ = author order:

$$c(1, n) = c(n,n) = c(\text{corresponding author}, n) = 1.$$

$$c(2,3) = 0.7.$$

For  $n \geq 4, 2 \leq k \leq n - 1$ :

$$c(k,n) = 2(n - k + 1)/(n + 1)(n - 2).$$

## Preferred Reporting Items for Systematic reviews and Meta-Analyses extension for Scoping Reviews (PRISMA-ScR) Checklist

| SECTION                                               | ITEM | PRISMA-ScR CHECKLIST ITEM                                                                                                                                                                                                                                                                                  | REPORTED ON PAGE #  |
|-------------------------------------------------------|------|------------------------------------------------------------------------------------------------------------------------------------------------------------------------------------------------------------------------------------------------------------------------------------------------------------|---------------------|
| <b>TITLE</b>                                          |      |                                                                                                                                                                                                                                                                                                            |                     |
| Title                                                 | 1    | Identify the report as a scoping review.                                                                                                                                                                                                                                                                   | 1                   |
| <b>ABSTRACT</b>                                       |      |                                                                                                                                                                                                                                                                                                            |                     |
| Structured summary                                    | 2    | Provide a structured summary that includes (as applicable): background, objectives, eligibility criteria, sources of evidence, charting methods, results, and conclusions that relate to the review questions and objectives.                                                                              | 1<br>(Unstructured) |
| <b>INTRODUCTION</b>                                   |      |                                                                                                                                                                                                                                                                                                            |                     |
| Rationale                                             | 3    | Describe the rationale for the review in the context of what is already known. Explain why the review questions/objectives lend themselves to a scoping review approach.                                                                                                                                   | 2                   |
| Objectives                                            | 4    | Provide an explicit statement of the questions and objectives being addressed with reference to their key elements (e.g., population or participants, concepts, and context) or other relevant key elements used to conceptualize the review questions and/or objectives.                                  | 2                   |
| <b>METHODS</b>                                        |      |                                                                                                                                                                                                                                                                                                            |                     |
| Protocol and registration                             | 5    | Indicate whether a review protocol exists; state if and where it can be accessed (e.g., a Web address); and if available, provide registration information, including the registration number.                                                                                                             | 2                   |
| Eligibility criteria                                  | 6    | Specify characteristics of the sources of evidence used as eligibility criteria (e.g., years considered, language, and publication status), and provide a rationale.                                                                                                                                       | 2-3                 |
| Information sources*                                  | 7    | Describe all information sources in the search (e.g., databases with dates of coverage and contact with authors to identify additional sources), as well as the date the most recent search was executed.                                                                                                  | 3                   |
| Search                                                | 8    | Present the full electronic search strategy for at least 1 database, including any limits used, such that it could be repeated.                                                                                                                                                                            | 3 & Supp S1.1       |
| Selection of sources of evidence†                     | 9    | State the process for selecting sources of evidence (i.e., screening and eligibility) included in the scoping review.                                                                                                                                                                                      | 4                   |
| Data charting process‡                                | 10   | Describe the methods of charting data from the included sources of evidence (e.g., calibrated forms or forms that have been tested by the team before their use, and whether data charting was done independently or in duplicate) and any processes for obtaining and confirming data from investigators. | 4                   |
| Data items                                            | 11   | List and define all variables for which data were sought and any assumptions and simplifications made.                                                                                                                                                                                                     | Supp S3             |
| Critical appraisal of individual sources of evidence§ | 12   | If done, provide a rationale for conducting a critical appraisal of included sources of evidence; describe the methods used and how this information was used in any data synthesis (if appropriate).                                                                                                      | N/A                 |
| Synthesis of results                                  | 13   | Describe the methods of handling and summarizing the data that were charted.                                                                                                                                                                                                                               | 4-5                 |

| SECTION                                       | ITEM | PRISMA-ScR CHECKLIST ITEM                                                                                                                                                                       | REPORTED ON PAGE # |
|-----------------------------------------------|------|-------------------------------------------------------------------------------------------------------------------------------------------------------------------------------------------------|--------------------|
| <b>RESULTS</b>                                |      |                                                                                                                                                                                                 |                    |
| Selection of sources of evidence              | 14   | Give numbers of sources of evidence screened, assessed for eligibility, and included in the review, with reasons for exclusions at each stage, ideally using a flow diagram.                    | 5 & Fig. 1         |
| Characteristics of sources of evidence        | 15   | For each source of evidence, present characteristics for which data were charted and provide the citations.                                                                                     | Suppl S4 & S5      |
| Critical appraisal within sources of evidence | 16   | If done, present data on critical appraisal of included sources of evidence (see item 12).                                                                                                      | N/A                |
| Results of individual sources of evidence     | 17   | For each included source of evidence, present the relevant data that were charted that relate to the review questions and objectives.                                                           | Suppl Table S4.1   |
| Synthesis of results                          | 18   | Summarize and/or present the charting results as they relate to the review questions and objectives.                                                                                            | 5-24               |
| <b>DISCUSSION</b>                             |      |                                                                                                                                                                                                 |                    |
| Summary of evidence                           | 19   | Summarize the main results (including an overview of concepts, themes, and types of evidence available), link to the review questions and objectives, and consider the relevance to key groups. | 24-25              |
| Limitations                                   | 20   | Discuss the limitations of the scoping review process.                                                                                                                                          | 25-26              |
| Conclusions                                   | 21   | Provide a general interpretation of the results with respect to the review questions and objectives, as well as potential implications and/or next steps.                                       | 26                 |
| <b>FUNDING</b>                                |      |                                                                                                                                                                                                 |                    |
| Funding                                       | 22   | Describe sources of funding for the included sources of evidence, as well as sources of funding for the scoping review. Describe the role of the funders of the scoping review.                 | 26                 |

JB1 = Joanna Briggs Institute; PRISMA-ScR = Preferred Reporting Items for Systematic reviews and Meta-Analyses extension for Scoping Reviews.

\* Where *sources of evidence* (see second footnote) are compiled from, such as bibliographic databases, social media platforms, and Web sites.

† A more inclusive/heterogeneous term used to account for the different types of evidence or data sources (e.g., quantitative and/or qualitative research, expert opinion, and policy documents) that may be eligible in a scoping review as opposed to only studies. This is not to be confused with *information sources* (see first footnote).

‡ The frameworks by Arksey and O'Malley (6) and Levac and colleagues (7) and the JBI guidance (4, 5) refer to the process of data extraction in a scoping review as data charting.

§ The process of systematically examining research evidence to assess its validity, results, and relevance before using it to inform a decision. This term is used for items 12 and 19 instead of "risk of bias" (which is more applicable to systematic reviews of interventions) to include and acknowledge the various sources of evidence that may be used in a scoping review (e.g., quantitative and/or qualitative research, expert opinion, and policy document).

From: Tricco AC, Lillie E, Zarin W, O'Brien KK, Colquhoun H, Levac D, et al. PRISMA Extension for Scoping Reviews (PRISMA-ScR): Checklist and Explanation. *Ann Intern Med*. 2018;169:467–473. doi: 10.7326/M18-0850.

### S3. Data Tables

#### 1. Article

This table contains data for each included article.

| #                                      | Data Item               | Format        | Description                                                                                                                              |
|----------------------------------------|-------------------------|---------------|------------------------------------------------------------------------------------------------------------------------------------------|
| 1                                      | UID                     | Integer       | Unique article identifier in database                                                                                                    |
| 2                                      | Article ID              | Author (Year) | Unique article identifier in following the APA 7 <sup>th</sup> in-text citation Author (Year) format.                                    |
| 3                                      | No. Author              | Integer       | Number of authors                                                                                                                        |
| 4                                      | Year                    | Year (YYYY)   | Year of publication                                                                                                                      |
| 5                                      | Title                   | Text          | Full article title                                                                                                                       |
| 6                                      | Published In            | Text          | The name of the publication (journal/book/conference, etc.)                                                                              |
| 7                                      | Country                 | Text          | Country of origin. If the authors were from more than one country, the country of origin is where the study or experiment was conducted. |
| 8                                      | Language                | Text          | Language of publication.                                                                                                                 |
| 9                                      | Google Scholar Citation | Integer       | The citation count reported by Google Scholar                                                                                            |
| 9                                      | Article Type            | Selection     | Full paper, Short Communication, Book Chapter, Abstract, Thesis, Study Protocol or Trial Registration.                                   |
| 10                                     | Is Human Study          | Yes/No        | Indicate whether it is a human study.                                                                                                    |
| 11                                     | Is Animal Study         | Yes/No        | Indicate whether it is an animal study.                                                                                                  |
| 12                                     | Is Cell Study           | Yes/No        | Indicate whether it is an in vitro cell study.                                                                                           |
| 13                                     | Is Chemical Analysis    | Yes/No        | Indicate whether it is a chemical analysis study.                                                                                        |
| 14                                     | RBAC Type               | Text          | The name of RBAC used in the study.                                                                                                      |
| 15                                     | RBAC Source             | Text          | The commercial source of RBAC.                                                                                                           |
| <i>Data items for human study only</i> |                         |               |                                                                                                                                          |
| 16                                     | Study Protocol Only     | Yes/No        | Is this article a study protocol?                                                                                                        |
| 17                                     | Clinical Study Type     | Text          | Specify the type of clinical study design, e.g., RCT, non-RCT, before and after study, etc., if relevant.                                |
| 18                                     | Case Report Type        | Selection     | Individual case report or case series, if relevant.                                                                                      |
| 19                                     | Registered Trial?       | Yes/No        | Is this a registered trial?                                                                                                              |
| 20                                     | Trial Registry          | Text          | Name of the trial registry, if registered.                                                                                               |
| 21                                     | Trial Registration no.  | Text          | The unique trial registration number, if registered.                                                                                     |

#### 2. Author

This table contains data for every author of the included article.

| # | Data Item   | Format | Description                                                                                                                   |
|---|-------------|--------|-------------------------------------------------------------------------------------------------------------------------------|
| 1 | Author ID   | Text   | Unique author ID in database                                                                                                  |
| 2 | Full Name   | Text   | Full name of the author                                                                                                       |
| 3 | Affiliation | Text   | Author's affiliating institution. If more than one affiliation is reported, only the primary / latest affiliation is entered. |
| 4 | Country     | Text   | The country where the author conducted the work.                                                                              |



### 3. Authorship

This table specifies the author and article relationship.

| # | Data Item           | Format        | Description                                                                                                                       |
|---|---------------------|---------------|-----------------------------------------------------------------------------------------------------------------------------------|
| 1 | Article ID          | Author (Year) | Unique article identifier in following the APA 7 <sup>th</sup> in-text citation Author (Year) format.                             |
| 2 | Author ID           | Text          | Unique author ID in database                                                                                                      |
| 3 | Author Affiliation  | Text          | Author's affiliating institution. If more than one affiliation is reported, on entry is recorded for each affiliated institution. |
| 4 | Affiliation Country | Text          | The country of the affiliated institution                                                                                         |
| 5 | Is Corresponding?   | Yes / No      | Is this the corresponding author for the article?                                                                                 |
| 6 | Author Order        | Sequential    | A sequential number indicating the author's order in the author list starting from 1.                                             |
| 7 | Weight Coefficient  | Numerical     | See Supplementary S4.                                                                                                             |

### 4. Institution

This table contains data for every author-affiliation of the included article.

| # | Data Item | Format    | Description                                                                                                            |
|---|-----------|-----------|------------------------------------------------------------------------------------------------------------------------|
| 1 | Name      | Text      | Name of an institution                                                                                                 |
| 2 | Country   | Text      | The country where this institution is located                                                                          |
| 3 | Type      | Selection | The institution type being one of Academic, Healthcare, Private Practice, Research Institution, or Commercial Company. |

### 5. Reference

This table captures the internal referencing across the included articles.

| # | Data Item            | Format        | Description                         |
|---|----------------------|---------------|-------------------------------------|
| 1 | Source Article ID    | Author (Year) | The source article.                 |
| 2 | Reference Article ID | Author (Year) | The article being referenced/cited. |

### 6. MeSH

| # | Data Item            | Format        | Description                              |
|---|----------------------|---------------|------------------------------------------|
| 1 | Article ID           | Author (Year) | The source article.                      |
| 2 | MeSHTerms (OnDemand) | Text          | MeSH terms generated from MeSH on Demand |
| 3 | MeSHTerms (PubMed)   | Text          | MeSH terms from PubMed, if available.    |

### 7. Condition-Action-Outcome

This table captures health or disease conditions investigated in each article, the potential beneficial actions, and the positive outcomes reported.

| # | Data Item         | Format        | Description                                                                          |
|---|-------------------|---------------|--------------------------------------------------------------------------------------|
| 1 | Article ID        | Author (Year) | The source article.                                                                  |
| 2 | Study Design      | Selection     | Type of study design which reported the results.                                     |
| 2 | Co-Intervention   | Text          | List of co-intervention with RBAC, e.g., chemotherapy, radiotherapy, etc.            |
| 3 | Condition         | Text          | Name of the health conditions or disease.                                            |
| 4 | Primary Site      | Text          | Primary body site or organ affected by the condition or investigated by the study.   |
| 5 | Secondary Site    | Text          | Secondary body site or organ affected by the condition or investigated by the study. |
| 6 | Beneficial Action | Text          | Beneficial action reported.                                                          |
| 7 | Outcome           | Text          | List of positive outcomes.                                                           |

## S4. Additional tables and figures

Table S4.1. The characteristics of all included articles in alphabetic order of the first author's name (excluding trial registrations).

| Article ID                 | Country     | Language | Type       | RBAC Type     | Source | Design   | T# | Condition | Action / Effect               |
|----------------------------|-------------|----------|------------|---------------|--------|----------|----|-----------|-------------------------------|
| Ali et al. (2012)          | USA         | English  | Full paper | Biobran MGN-3 | Daiwa  | RCT      | T1 | Healthy   | Immunomodulation              |
| An (2011)                  | South Korea | Korean   | Thesis     | RBEP/EFR      | Erom   | Animal   | T0 | Cancer    | Anticancer                    |
|                            |             |          |            |               |        | Animal   | T0 | Allergy   | Antiallergy                   |
|                            |             |          |            |               |        | Cell     | T0 | Healthy   | Noncytotoxic                  |
|                            |             |          |            |               |        | Chemical | T0 | Healthy   | Antioxidant                   |
| Badr El-Din et al. (2008)  | Egypt       | English  | Full paper | Biobran MGN-3 | Daiwa  | Animal   | T0 | Cancer    | Anticancer                    |
| Badr El-Din et al. (2016a) | Egypt       | English  | Full paper | Biobran MGN-3 | Daiwa  | Animal   | T0 | Cancer    | Chemoprevention               |
| Badr El-Din et al. (2016b) | Egypt       | English  | Full paper | Biobran MGN-3 | Daiwa  | Animal   | T0 | Cancer    | Synergistic anticancer effect |
| Badr El-Din et al. (2016c) | Egypt       | English  | Full paper | Biobran MGN-3 | Daiwa  | Animal   | T0 | Cancer    | Chemoprevention               |
|                            |             |          |            |               |        |          |    |           | Hepatoprotection              |
| Badr El-Din et al. (2019)  | Egypt       | English  | Full paper | Biobran MGN-3 | Daiwa  | Animal   | T0 | Cancer    | Synergistic anticancer effect |
| Badr El-Din et al. (2020)  | Egypt       | English  | Full paper | Biobran MGN-3 | Daiwa  | Animal   | T0 | Cancer    | Chemoprevention               |
|                            |             |          |            |               |        |          |    |           | Hepatoprotection              |
| Bae et al. (2004)          | South Korea | Korean   | Full paper | Biobran MGN-3 | Daiwa  | Animal   | T0 | Healthy   | Immunomodulation              |
|                            |             |          |            |               |        | Animal   | T0 | Cancer    | Anticancer                    |
|                            |             |          |            |               |        | Animal   | T0 | Allergy   | Antiallergy                   |
| Bang et al. (2010)         | Vietnam     | English  | Full paper | Biobran MGN-3 | Daiwa  | RCT      | T2 | Cancer    | Synergistic anticancer effect |
| Brush et al. (2010)        | USA         | English  | Abstract   | Biobran MGN-3 | Daiwa  | Cell     | T0 | Cancer    | Anticancer                    |
| Cadden et al. (2020)       | USA         | English  | Abstract   | Biobran MGN-3 | Daiwa  | RCT      | T1 | HIV       | No significant effect         |
| Chae et al. (2004)         | South Korea | Korean   | Full paper | Biobran MGN-3 | Daiwa  | Cell     | T0 | Healthy   | Immunomodulation              |
| Choi et al. (2014)         | South Korea | English  | Full paper | RBEP/EFR      | Erom   | RCT      | T1 | Healthy   | Immunomodulation              |
| Cholujova et al. (2009)    | Slovakia    | English  | Full paper | Biobran MGN-3 | Daiwa  | Cell     | T0 | Healthy   | Immunomodulation              |
| Cholujova et al. (2013)    | Slovakia    | English  | Full paper | Biobran MGN-3 | Daiwa  | RCT      | T1 | Cancer    | Immunomodulation              |

## Modified Rice Bran Arabinoxylan as a Nutraceutical in Health and Disease – A Scoping Review with Bibliometric Analysis

|                               |             |          |            |               |             |         |    |                           |                               |
|-------------------------------|-------------|----------|------------|---------------|-------------|---------|----|---------------------------|-------------------------------|
| Chung et al. (2015)           | South Korea | English  | Full paper | BPP/FF        | STR Biotech | Cell    | T0 | Healthy                   | Hepatoprotection              |
|                               |             |          |            |               |             | Animal  | T0 | Hepatitis / Liver Disease | Hepatoprotection              |
| Daizo et al. (2001)           | Japan       | Japanese | Abstract   | Biobran MGN-3 | Daiwa       | Animal  | T0 | Hepatitis / Liver Disease | Hepatoprotection              |
| Egashira et al. (2013)        | Japan       | English  | Abstract   | Biobran MGN-3 | Daiwa       | Animal  | T0 | Hepatitis / Liver Disease | Hepatoprotection              |
| Elsaid et al. (2018)          | Egypt       | English  | Full paper | Biobran MGN-3 | Daiwa       | RCT     | T1 | Geriatric                 | Immunomodulation              |
| Elsaid et al. (2020)          | Egypt       | English  | Full paper | Biobran MGN-3 | Daiwa       | RCT     | T1 | Geriatric                 | Psychoneuroimmuno-modulation  |
| Elsaid et al. (2021)          | Egypt       | English  | Full paper | Biobran MGN-3 | Daiwa       | RCT     | T2 | Cold / Flu                | Antiflu                       |
|                               |             |          |            |               |             |         |    | Geriatric                 | Antiflu                       |
| Endo and Kanbayashi (2003)    | Canada      | English  | Short Comm | Biobran MGN-3 | Daiwa       | Animal  | T0 | Healthy                   | Antiwasting                   |
| Ghoneum and Abedi (2004)      | USA         | English  | Full paper | Biobran MGN-3 | Daiwa       | Animal  | T0 | Geriatric                 | Immunomodulation              |
|                               |             |          |            |               |             | Cell    | T0 | Geriatric                 | Immunomodulation              |
| Ghoneum and Agrawal (2011)    | USA         | English  | Full paper | Biobran MGN-3 | Daiwa       | Cell    | T0 | Healthy                   | Immunomodulation              |
| Ghoneum and Agrawal (2014)    | USA         | English  | Full paper | Biobran MGN-3 | Daiwa       | Cell    | T0 | Healthy                   | Immunomodulation              |
| Ghoneum and Brown (1999)      | USA         | English  | Chapter    | Biobran MGN-3 | Daiwa       | Bef-Aft | T1 | Cancer                    | Immunomodulation              |
| Ghoneum and El Sayed (2021)   | USA         | English  | Full paper | Biobran MGN-3 | Daiwa       | Animal  | T0 | Alzheimer's disease       | Memory enhancer               |
|                               |             |          |            |               |             |         |    |                           | Antioxidant                   |
| Ghoneum and Gollapudi (2003)  | USA         | English  | Full paper | Biobran MGN-3 | Daiwa       | Cell    | T0 | Cancer                    | Anticancer                    |
| Ghoneum and Gollapudi (2005a) | USA         | English  | Full paper | Biobran MGN-3 | Daiwa       | Cell    | T0 | Cancer                    | Synergistic anticancer effect |
| Ghoneum and Gollapudi (2005b) | USA         | English  | Full paper | Biobran MGN-3 | Daiwa       | Cell    | T0 | Cancer                    | Synergistic anticancer effect |
| Ghoneum and Gollapudi (2011)  | USA         | English  | Full paper | Biobran MGN-3 | Daiwa       | Cell    | T0 | Cancer                    | Synergistic anticancer effect |
| Ghoneum and Jewett (2000)     | USA         | English  | Full paper | Biobran MGN-3 | Daiwa       | Cell    | T0 | Healthy                   | Immunomodulation              |
| Ghoneum and Matsuura (2004)   | USA         | English  | Full paper | Biobran MGN-3 | Daiwa       | Cell    | T0 | Healthy                   | Immunomodulation              |
| Ghoneum (1998a)               | USA         | English  | Full paper | Biobran MGN-3 | Daiwa       | Cell    | T1 | HIV                       | Antiretroviral                |
| Ghoneum (1998b)               | USA         | English  | Full paper | Biobran MGN-3 | Daiwa       | Bef-Aft | T0 | Healthy                   | Immunomodulation              |
| Ghoneum (1999)                | USA         | English  | Abstract   | Biobran MGN-3 | Daiwa       | Bef-Aft | T1 | Cancer                    | Immunomodulation              |
|                               |             |          |            |               |             |         |    | Chemical exposure         | Immunomodulation              |
| Ghoneum et al. (2000)         | USA         | English  | Abstract   | Biobran MGN-3 | Daiwa       | Cell    | T0 | Cancer                    | Anticancer                    |

## Modified Rice Bran Arabinoxylan as a Nutraceutical in Health and Disease – A Scoping Review with Bibliometric Analysis

|                              |             |          |            |               |       |             |    |                           |                                          |
|------------------------------|-------------|----------|------------|---------------|-------|-------------|----|---------------------------|------------------------------------------|
| Ghoneum et al. (2008)        | USA         | English  | Full paper | Biobran MGN-3 | Daiwa | Cell        | T0 | Healthy                   | Antibacterial                            |
| Ghoneum et al. (2013)        | USA         | English  | Full paper | Biobran MGN-3 | Daiwa | Animal      | T0 | Healthy                   | Radioprotection<br>Antioxidant           |
| Ghoneum et al. (2014)        | USA         | English  | Full paper | Biobran MGN-3 | Daiwa | Cell        | T0 | Cancer                    | Synergistic anticancer effect            |
| Giese et al. (2008)          | USA         | English  | Full paper | Biobran MGN-3 | Daiwa | Animal      | T0 | Healthy                   | Immunomodulation                         |
| Gollapudi and Ghoneum (2008) | USA         | English  | Full paper | Biobran MGN-3 | Daiwa | Cell        | T0 | Cancer                    | Synergistic anticancer effect            |
| Golombick et al. (2016)      | Australia   | English  | Full paper | Biobran MGN-3 | Daiwa | Bef-Aft     | T1 | Cancer                    | Immunomodulation                         |
| Hajtó and Kirsch (2013)      | Hungary     | English  | Full paper | Biobran MGN-3 | Daiwa | Case Rep    | T1 | Cancer                    | Synergistic anticancer effect            |
| Hajtó (2017)                 | Hungary     | English  | Full paper | Biobran MGN-3 | Daiwa | Case Series | T1 | Cancer                    | Synergistic anticancer effect            |
| Hajtó (2018)                 | Hungary     | English  | Full paper | Biobran MGN-3 | Daiwa | Case Series | T1 | Cancer                    | Synergistic anticancer effect            |
| Hajtó et al. (2015)          | Hungary     | English  | Full paper | Biobran MGN-3 | Daiwa | Case Series | T1 | Cancer                    | Synergistic anticancer effect            |
| Hajtó et al. (2016a)         | Hungary     | English  | Full paper | Biobran MGN-3 | Daiwa | Case Series | T1 | Cancer                    | Synergistic anticancer effect            |
| Hajtó et al. (2016b)         | Hungary     | English  | Full paper | Biobran MGN-3 | Daiwa | Cross-Sect  | T1 | Cancer                    | Psychoneuroimmuno-<br>modulation         |
| Hoshino et al. (2010)        | Japan       | English  | Full paper | Biobran MGN-3 | Daiwa | Cell        | T0 | Healthy                   | Antiinflammation                         |
| Ichihashi (2004)             | Japan       | Japanese | Full paper | Biobran MGN-3 | Daiwa | Case Rep    | T1 | Rheumatism                | Antirheumatic effect<br>Antiinflammation |
| Itoh et al. (2015)           | Japan       | English  | Full paper | Biobran MGN-3 | Daiwa | RCT         | T1 | Cancer<br>Gastroenteritis | Immunomodulation<br>Gastroprotection     |
| Jacoby et al. (2001)         | USA         | English  | Full paper | Biobran MGN-3 | Daiwa | Animal      | T0 | Healthy                   | Chemoprotection<br>Gastroprotection      |
| Kaketani (2004)              | Japan       | Japanese | Full paper | Biobran MGN-3 | Daiwa | Case Series | T1 | Cancer                    | Synergistic anticancer effect            |
| Kambayashi and Endo (2002)   | Canada      | Japanese | Abstract   | Biobran MGN-3 | Daiwa | Animal      | T0 | Allergy                   | Antiasthma<br>Antiinflammation           |
| Kamiya et al. (2014)         | Japan       | English  | Full paper | Biobran MGN-3 | Daiwa | RCT         | T1 | Irritable bowel syndrome  | Immunomodulation                         |
| Kang et al. (2022)           | South Korea | Korean   | Full paper | RBEP/EFR      | Erom  | Cell        | T0 | Healthy                   | Immunomodulation                         |
| Kawai (2004)                 | Japan       | Japanese | Full paper | Biobran MGN-3 | Daiwa | Case Series | T1 | Cancer                    | Synergistic anticancer effect            |

## Modified Rice Bran Arabinoxylan as a Nutraceutical in Health and Disease – A Scoping Review with Bibliometric Analysis

|                          |             |         |            |                           |             |             |    |                           |                               |
|--------------------------|-------------|---------|------------|---------------------------|-------------|-------------|----|---------------------------|-------------------------------|
| Kenyon (2001)            | UK          | English | Full paper | Biobran MGN-3             | Daiwa       | Bef-Aft     | T1 | Chronic fatigue syndrome  | Antifatigue                   |
| Kim D.J. et al. (2011a)  | S.Korea     | Korean  | Full paper | Fermented SuperC3GHi bran | Erom        | Animal      | T0 | Cancer                    | Anticancer                    |
|                          |             |         |            |                           |             | Animal      | T0 | Allergy                   | Antiinflammation              |
|                          |             |         |            |                           |             | Cell        | T0 | Healthy                   | Antiallergy                   |
| Kim D.J. et al. (2011b)  | South Korea | Korean  | Full paper | Fermented black rice bran | STR Biotech | Animal      | T0 | Healthy                   | Immunomodulation              |
| Kim H.Y. et al. (2005)   | South Korea | English | Full paper | RBEP/EFR                  | Erom        | Animal      | T0 | Healthy                   | Immunomodulation              |
|                          | South Korea |         |            |                           |             | Cell        | T0 | Healthy                   | Immunomodulation              |
| Kim H.Y. et al. (2007)   | South Korea | English | Full paper | RBEP/EFR                  | Erom        | Animal      | T0 | Cancer                    | Anticancer                    |
| Kim J.M. et al. (2020)   | South Korea | English | Full paper | ONS                       | Erom        | NRCT        | T1 | Cancer                    | Psychoneuroimmuno-modulation  |
| Kim S.P. et al. (2013)   | South Korea | English | Full paper | BPP/FF                    | STR Biotech | Cell        | T0 | Healthy                   | Immunomodulation              |
|                          | South Korea |         |            |                           |             | Animal      | T0 | Endotoxemia               | Antioxidant                   |
|                          | South Korea |         |            |                           |             | Animal      | T0 | Hepatitis / Liver Disease | Hepatoprotection              |
| Kim S.P. et al. (2014)   | South Korea | English | Full paper | BPP/FF                    | STR Biotech | Cell        | T0 | Healthy                   | Immunomodulation              |
|                          | South Korea |         |            |                           |             | Animal      | T0 | Bacterial infection       | Antibacterial                 |
| Kim S.P. et al. (2018)   | South Korea | English | Full paper | BPRBE                     | STR Biotech | Cell        | T0 | Healthy                   | Immunomodulation              |
|                          |             |         |            |                           |             | Animal      | T0 | Gastroenteritis           | Antibacterial                 |
| Lewis et al. (2020a)     | USA         | English | Full paper | Biobran MGN-3             | Daiwa       | RCT         | T1 | HIV                       | Endothelial improvement       |
| Lewis et al. (2020b)     | USA         | English | Full paper | Biobran MGN-3             | Daiwa       | RCT         | T1 | HIV                       | Immunomodulation              |
| Lewis et al. (2020c)     | USA         | English | Full paper | Biobran MGN-3             | Daiwa       | RCT         | T1 | Hepatitis / Liver Disease | Hepatoprotection              |
| Lissoni et al. (2008)    | Italy       | English | Full paper | Biobran MGN-3             | Daiwa       | Bef-Aft     | T1 | Cancer                    | Immunomodulation              |
| Markus et al. (2006)     | USA         | English | Full paper | Biobran MGN-3             | Daiwa       | Case Series | T1 | Cancer                    | Anticancer                    |
| Masood et al. (2013)     | Pakistan    | English | Full paper | Biobran MGN-3             | Daiwa       | RCT         | T1 | Cancer                    | Psychoneuroimmuno-modulation  |
| McDermott et al. (2006)  | UK          | English | Full paper | Biobran MGN-3             | Daiwa       | RCT         | T1 | Chronic fatigue syndrome  | No significant effect         |
| Meshitsuka (2013)        | Japan       | English | Full paper | Biobran MGN-3             | Daiwa       | Case Series | T1 | Cancer                    | Synergistic anticancer effect |
| Miura et al. (2004/2013) | Japan       | English | Chapter    | Biobran MGN-3             | Daiwa       | Cell        | T0 | Healthy                   | Immunomodulation              |
| Noaman et al. (2008)     | Egypt       | English | Full paper | Biobran MGN-3             | Daiwa       | Animal      | T0 | Cancer                    | Anticancer                    |

|                              |             |          |            |               |       |                |          |                                       |                                                                                      |
|------------------------------|-------------|----------|------------|---------------|-------|----------------|----------|---------------------------------------|--------------------------------------------------------------------------------------|
|                              |             |          |            |               |       |                |          |                                       | Antioxidant                                                                          |
| Ohara et al. (2000)          | Japan       | English  | Full paper | Biobran MGN-3 | Daiwa | Animal         | T0       | Diabetes mellitus                     | Antihyperlipidemic effect<br>Taste influencer                                        |
| Ohara et al. (2002)          | Japan       | English  | Full paper | Biobran MGN-3 | Daiwa | Animal         | T0       | Diabetes mellitus                     | Antihyperglycemic effect<br>Antihyperlipidemic effect                                |
| Okamura (2004)               | Japan       | Japanese | Full paper | Biobran MGN-3 | Daiwa | Case Rep       | T1       | Cancer                                | Synergistic anticancer effect<br>Immunomodulation<br>Hepatoprotection                |
| Ooi et al. (2020)            | Australia   | English  | Protocol   | Biobran MGN-3 | Daiwa | NA             | T1       | NA                                    | NA                                                                                   |
| Pérez-Martínez et al. (2015) | Spain       | English  | Full paper | Biobran MGN-3 | Daiwa | Cell<br>Animal | T0<br>T0 | Healthy<br>Cancer                     | Immunomodulation<br>Immunomodulation                                                 |
| Pescatore et al. (2022)      | USA         | English  | Full paper | Biobran MGN-3 | Daiwa | Bef-Aft        | T1       | Cancer                                | Antimetastatic effect                                                                |
| Petrovics et al. (2016)      | Hungary     | English  | Full paper | Biobran MGN-3 | Daiwa | RCT            | T1       | Chronic fatigue<br>syndrome<br>Cancer | Antifatigue<br><br>Psychoneuroimmuno-<br>modulation                                  |
| Salama et al. (2016)         | Egypt       | English  | Full paper | Biobran MGN-3 | Daiwa | RCT            | T1       | Hepatitis / Liver Disease             | Hepatoprotection<br>Antiviral                                                        |
| Sudo et al. (2001)           | Japan       | Japanese | Full paper | Biobran MGN-3 | Daiwa | Animal         | T0       | Endotoxemia                           | Antiinflammation                                                                     |
| Takahara and Sano (2004)     | Japan       | Japanese | Full paper | Biobran MGN-3 | Daiwa | RCT            | T2       | Cancer                                | Psychoneuroimmuno-<br>modulation                                                     |
| Tan and Flores (2020)        | Philippines | English  | Full paper | Biobran MGN-3 | Daiwa | RCT            | T2       | Cancer                                | Synergistic anticancer effect<br>Radioprotection<br>Psychoneuroimmuno-<br>modulation |
| Tazawa et al. (2000)         | Japan       | English  | Full paper | Biobran MGN-3 | Daiwa | Chemical       | T0       | Oxidative stress                      | Antioxidant                                                                          |
| Tazawa et al. (2003)         | Japan       | Japanese | Full paper | Biobran MGN-3 | Daiwa | RCT            | T1       | Cold / Flu<br>Geriatric               | Antiflu<br>Immunomodulation                                                          |
| Tsunekawa (2004)             | Japan       | Japanese | Full paper | Biobran MGN-3 | Daiwa | Case Rep       | T1       | Cancer                                | Synergistic anticancer effect<br>Psychoneuroimmuno-<br>modulation                    |
| Yamada et al. (2002)         | Japan       | Japanese | Abstract   | Biobran MGN-3 | Daiwa | Animal         | T0       | Hepatitis / Liver Disease             | Hepatoprotection                                                                     |

# Modified Rice Bran Arabinoxylan as a Nutraceutical in Health and Disease – A Scoping Review with Bibliometric Analysis

|                      |             |         |            |               |       |        |    |                           |                                                    |
|----------------------|-------------|---------|------------|---------------|-------|--------|----|---------------------------|----------------------------------------------------|
| Yu et al. (2004)     | South Korea | English | Full paper | RBEP/EFR      | Erom  | Cell   | T0 | Healthy                   | Immunomodulation                                   |
| Zhao et al. (2020)   | China       | English | Full paper | Biobran MGN-3 | Daiwa | Animal | T0 | Gastroenteritis           | Radioprotection<br>Antiinflammation<br>Antioxidant |
| Zheng et al. (2012a) | Japan       | English | Full paper | Biobran MGN-3 | Daiwa | Animal | T0 | Hepatitis / Liver Disease | Hepatoprotection<br>Antiinflammation               |
| Zheng et al. (2012b) | Japan       | English | Full paper | Biobran MGN-3 | Daiwa | Animal | T0 | Hepatitis / Liver Disease | Hepatoprotection<br>Antiinflammation               |
| Zhu et al. (2017)    | Japan       | English | Full paper | Biobran MGN-3 | Daiwa | Cell   | T0 | Healthy                   | Antiangiogenesis                                   |

**Abbreviations:** Bef-Aft, before and after study; BPP/FF, bioprocessed polysaccharide or fermented black rice bran; BPRBE, bioprocessed rice bran extract; Cross-Sect, descriptive cross-sectional study; NA, not available; NRCT, non-randomised controlled trial; ONS, oral nutritional supplement; RBEP/EFR, rice bran bio-exopolymer or Erom's fermented rice bran; Rep, report; RCT, randomised controlled trial; T#, translational research spectrum classification (T1 – T4); UK, United Kingdom; USA, United States of America.



Table S4.2. The research output by country according to article count and authors' total weighted coefficient (TWC).

| Article | Ranking By Author | TWC | Country     | No. Authors | No. Institutions | Publishing Period | Count by Article's Country (% Total) <sup>1</sup> | Count by Author's Country (% Total) <sup>2</sup> | Author's TWC |
|---------|-------------------|-----|-------------|-------------|------------------|-------------------|---------------------------------------------------|--------------------------------------------------|--------------|
| 1       | 1                 | 1   | USA         | 65          | 19               | 1988 - 2022       | 29 (29.59%)                                       | 43 (43.88%)                                      | 78.04        |
| 2       | 2                 | 2   | Japan       | 80          | 23               | 2000 - 2017       | 22 (22.45%)                                       | 27 (27.55%)                                      | 56.71        |
| 3       | 3                 | 3   | South Korea | 44          | 18               | 2004 - 2022       | 15 (15.31%)                                       | 15 (15.31%)                                      | 42.16        |
| 4       | 4                 | 4   | Egypt       | 16          | 5                | 2008 - 2021       | 11 (11.22%)                                       | 14 (14.29%)                                      | 22.54        |
| 5       | 5                 | 5   | Hungary     | 12          | 1                | 2013 - 2018       | 7 (7.14%)                                         | 7 (7.14%)                                        | 14.37        |
| 6       | 7                 | 6   | Australia   | 12          | 7                | 2016 - 2020       | 2 (2.04%)                                         | 2 (2.04%)                                        | 6.77         |
| 6       | 7                 | 9   | Canada      | 2           | 1                | 2002 - 2003       | 2 (2.04%)                                         | 2 (2.04%)                                        | 4.00         |
| 6       | 6                 | 8   | UK          | 7           | 6                | 2001 - 2015       | 2 (2.04%)                                         | 3 (3.06%)                                        | 4.05         |
| 6       | 7                 | 7   | Slovakia    | 8           | 2                | 2009 - 2013       | 2 (2.04%)                                         | 2 (2.04%)                                        | 5.70         |
| 7       | 7                 | 10  | China       | 5           | 4                | 2015 - 2020       | 1 (1.02%)                                         | 2 (2.04%)                                        | 3.00         |
| 7       | 8                 | 12  | Italy       | 11          | 4                | 2008 - 2008       | 1 (1.02%)                                         | 1 (1.02%)                                        | 2.00         |
| 7       | 8                 | 11  | Pakistan    | 3           | 1                | 2013 - 2013       | 1 (1.02%)                                         | 1 (1.02%)                                        | 2.70         |
| 7       | 8                 | 12  | Philippines | 2           | 1                | 2020 - 2020       | 1 (1.02%)                                         | 1 (1.02%)                                        | 2.00         |
| 7       | 8                 | 15  | Spain       | 8           | 4                | 2015 - 2015       | 1 (1.02%)                                         | 1 (1.02%)                                        | 1.73         |
| 7       | 8                 | 14  | Vietnam     | 8           | 1                | 2010 - 2010       | 1 (1.02%)                                         | 1 (1.02%)                                        | 1.90         |
| 7       | 8                 | 17  | Germany     | 4           | 1                | 2015 - 2015       | 1 (1.02%)                                         | 1 (1.02%)                                        | 1.22         |
| -       | 8                 | 18  | Iraq        | 1           | 1                | 2019 - 2019       | 0 (0.00%)                                         | 1 (1.02%)                                        | 0.40         |
| -       | 7                 | 16  | Switzerland | 1           | 1                | 2013 - 2015       | 0 (0.00%)                                         | 2 (2.04%)                                        | 1.33         |

**Note:** <sup>1</sup> An article's country of origin is based on where the study is being conducted or the first author's country.

<sup>2</sup> The count by author's country is based on co-authorship, with all co-authors' countries counting the same article as research output.

*Table S4.3. Funding statement from all included articles.*

| <b>ArticleID</b>           | <b>Funding Statement</b>                                                                                                                                                                                                                                                                                                                     |
|----------------------------|----------------------------------------------------------------------------------------------------------------------------------------------------------------------------------------------------------------------------------------------------------------------------------------------------------------------------------------------|
| Ali et al. (2012)          | This study was supported by a gift from Daiwa Pharmaceutical Inc., Tokyo, Japan, which is the manufacturer of RBAC and research and training funds from the Laboratory for Clinical and Biological Studies at the University of Miami, Miller School of Medicine. Daiwa Pharmaceutical Inc. did not participate in the design of this study. |
| An (2011)                  | Not disclosed                                                                                                                                                                                                                                                                                                                                |
| Badr El-Din et al. (2008)  | We thank Daiwa Pharmaceutical Co. LTD, Tokyo, Japan, for the financial support of this project.                                                                                                                                                                                                                                              |
| Badr El-Din et al. (2016a) | This work was supported by Daiwa Pharmaceutical Co Ltd, Tokyo, Japan; Grant #T0099108 (M. Ghoneum); and by NIH-NIMHD Grants U54MD007598 (formerly U54RR026138) and S21 MD000103 (D. Pan).                                                                                                                                                    |
| Badr El-Din et al. (2016b) | The authors would like to acknowledge Daiwa Pharmaceutical Co. Ltd., Tokyo, Japan, for the financial support of this project, Grant #T0099108.                                                                                                                                                                                               |
| Badr El-Din et al. (2016c) | Not disclosed                                                                                                                                                                                                                                                                                                                                |
| Badr El-Din et al. (2019)  | Not disclosed                                                                                                                                                                                                                                                                                                                                |
| Badr El-Din et al. (2020)  | Partial support was provided by Daiwa Pharmaceutical Co., Ltd., Tokyo, Japan.                                                                                                                                                                                                                                                                |
| Bae et al. (2004)          | This study was carried out by the support of the research fund of the Institute of Life Science of EromLife.                                                                                                                                                                                                                                 |
| Bang et al. (2010)         | Not disclosed                                                                                                                                                                                                                                                                                                                                |
| Brush et al. (2010)        | Not disclosed                                                                                                                                                                                                                                                                                                                                |
| Cadden et al. (2020)       | Not disclosed                                                                                                                                                                                                                                                                                                                                |
| Chae et al. (2004)         | This study was supported by research funds from the Erom Life Institute of Life Sciences.                                                                                                                                                                                                                                                    |
| Choi et al. (2014)         | This work was supported by “Food Functionality Evaluation program” under the Ministry of Agriculture, Food and Rural Affairs, and partly Korea Food Research Institute and Erom.                                                                                                                                                             |
| Cholujova et al. (2009)    | This work was supported by a commercial grant from Daiwa Pharmaceutical Co. Ltd.                                                                                                                                                                                                                                                             |
| Cholujova et al. (2013)    | The study was supported by research funding from Daiwa Pharmaceutical to J.S.                                                                                                                                                                                                                                                                |
| Chung et al. (2015)        | This study was supported by grants from the Republic of Korea’s Small and Medium Business Administration (SMBA) (S1061057).                                                                                                                                                                                                                  |
| Daizo et al. (2001)        | Not disclosed                                                                                                                                                                                                                                                                                                                                |
| Egashira et al. (2013)     | Not disclosed                                                                                                                                                                                                                                                                                                                                |

|                             |                                                                                                                                                                                                                                                             |
|-----------------------------|-------------------------------------------------------------------------------------------------------------------------------------------------------------------------------------------------------------------------------------------------------------|
| Elsaid et al. (2018)        | The authors would like to acknowledge Daiwa Pharmaceutical Co., Ltd., Tokyo, Japan, for supplying Biobran/MGN-3 for this study. This study was supported in part by NIH-NIMHD grant nos. U54MD007598 and NIH/NCATS grant nos. UL1TR000124 and S21 MD000103. |
| Elsaid et al. (2020)        | The authors would like to thank Daiwa Pharmaceutical Co., Ltd., Tokyo, Japan for providing Biobran/MGN-3.                                                                                                                                                   |
| Elsaid et al. (2021)        | This research received no external funding. The authors gratefully acknowledge Daiwa Pharmaceutical Co., Ltd. for providing Biobran/MGN-3.                                                                                                                  |
| Endo & Kanbayashi (2003)    | Not disclosed                                                                                                                                                                                                                                               |
| Ghoneum & Abedi (2004)      | Not disclosed                                                                                                                                                                                                                                               |
| Ghoneum & Agrawal (2011)    | Not disclosed                                                                                                                                                                                                                                               |
| Ghoneum & Agrawal (2014)    | This work was supported by grant #C0030300 from Daiwa Pharmaceutical Co., Ltd., Japan.                                                                                                                                                                      |
| Ghoneum & Brown (1999)      | Not disclosed                                                                                                                                                                                                                                               |
| Ghoneum & El Sayed (2021)   | Biobran/MGN-3 was provided by Daiwa Pharm. Co., Ltd, Japan. This work was funded by Daiwa Pharmaceutical Co., Ltd., Tokyo, Japan; Grant #T0099108.                                                                                                          |
| Ghoneum & Gollapudi (2003)  | This work was supported by a grant from Daiwa Pharmaceutical Company, Tokyo, Japan.                                                                                                                                                                         |
| Ghoneum & Gollapudi (2005a) | The authors would also like to thank Daiwa Pharmaceutical Co. LTD, Tokyo, Japan for the financial support of this project.                                                                                                                                  |
| Ghoneum & Gollapudi (2005b) | The authors would also like to thank Daiwa Pharmaceutical Co., Tokyo, Japan, Ltd., for the financial support of this project.                                                                                                                               |
| Ghoneum & Gollapudi (2011)  | Not disclosed                                                                                                                                                                                                                                               |
| Ghoneum & Jewett (2000)     | Not disclosed                                                                                                                                                                                                                                               |
| Ghoneum & Matsuura (2004)   | This work was supported by grant #D22988 from Daiwa Pharmaceutical Co., LTD. Tokyo, Japan.                                                                                                                                                                  |
| Ghoneum (1998b)             | Not disclosed                                                                                                                                                                                                                                               |
| Ghoneum (1998a)             | Not disclosed                                                                                                                                                                                                                                               |
| Ghoneum (1999)              | Not disclosed                                                                                                                                                                                                                                               |
| Ghoneum et al. (2000)       | MGN-3, commercially known as Bio Bran, was provided by Daiwa Pharmaceuticals Company. Ltd., Tokyo, Japan. Supported in part by VA Medical Research Funds and by funds provided by Daiwa Pharmaceuticals Company, Ltd.                                       |
| Ghoneum et al. (2013)       | This work was supported by Daiwa Pharmaceutical Co. Ltd, Tokyo, Japan; Grant #T0099108.                                                                                                                                                                     |
| Ghoneum et al. (2014)       | The Authors would like to acknowledge Daiwa Pharmaceutical Co. Ltd., Tokyo, Japan, for the financial support of this project.                                                                                                                               |

|                            |                                                                                                                                                                                                                                                                       |
|----------------------------|-----------------------------------------------------------------------------------------------------------------------------------------------------------------------------------------------------------------------------------------------------------------------|
| Ghoneum et al. (2008)      | This work was supported by grant #D22988 from Daiwa Pharmaceutical Co. Ltd., Tokyo, Japan.                                                                                                                                                                            |
| Giese et al. (2008)        | Not disclosed                                                                                                                                                                                                                                                         |
| Gollapudi & Ghoneum (2008) | The authors would like to acknowledge Daiwa Pharmaceutical Co. Ltd., Tokyo, Japan, for the financial support of this project.                                                                                                                                         |
| Golombick et al. (2016)    | Terry Golombick received partial funding support during the study period. The other authors received no financial support. The publication costs are borne by Biomedica.                                                                                              |
| Hajtó & Kirsch (2013)      | Not disclosed                                                                                                                                                                                                                                                         |
| Hajtó (2017)               | Not disclosed                                                                                                                                                                                                                                                         |
| Hajtó (2018)               | Not disclosed                                                                                                                                                                                                                                                         |
| Hajtó et al. (2015)        | The authors thank Mrs. Cornelia van den Bergh (for her grants to support this research).                                                                                                                                                                              |
| Hajtó et al. (2016a)       | The authors thank Mrs. Cornelia van den Bergh (for her grants to support this research).                                                                                                                                                                              |
| Hajtó et al. (2016b)       | Not disclosed                                                                                                                                                                                                                                                         |
| Hoshino et al. (2010)      | Not disclosed                                                                                                                                                                                                                                                         |
| Ichihashi (2004)           | Not disclosed                                                                                                                                                                                                                                                         |
| Itoh et al. (2015)         | The authors deeply appreciate Daiwa Pharmaceutical Co., Ltd., the manufacturer of both the HRB and placebo foods, which were provided free of charge.                                                                                                                 |
| Jacoby et al. (2001)       | Not disclosed                                                                                                                                                                                                                                                         |
| Kaketani (2004)            | Not disclosed                                                                                                                                                                                                                                                         |
| Kambayashi & Endo (2002)   | Not disclosed                                                                                                                                                                                                                                                         |
| Kamiya et al. (2014)       | They also thank Daiwa Pharmaceutical Co. Ltd. for supplying the powder of both Biobran and placebo and for the assistance of this paper submission. This study was supported, in part, by a grant of Japanese Society of Psychosomatic Medicine on Digestive Disease. |
| Kang et al. (2022)         | Not disclosed                                                                                                                                                                                                                                                         |
| Kawai (2004)               | Not disclosed                                                                                                                                                                                                                                                         |
| Kenyon (2001)              | Not disclosed                                                                                                                                                                                                                                                         |
| Kim D.J. et al. (2011b)    | Not disclosed                                                                                                                                                                                                                                                         |
| Kim D.J. et al. (2011a)    | This study was funded by the Institute of Technology Planning and Evaluation (IPET) for Food, Agriculture, Forestry and Fisheries (Project No.: 108096-03-1-HD110).                                                                                                   |
| Kim H.Y. et al. (2005)     | This work was supported by the fund of Erom Corporation                                                                                                                                                                                                               |
| Kim H.Y. et al. (2007)     | Not disclosed                                                                                                                                                                                                                                                         |

|                          |                                                                                                                                                                                                                                                                                                                                                                                                                                                                                                                                                                       |
|--------------------------|-----------------------------------------------------------------------------------------------------------------------------------------------------------------------------------------------------------------------------------------------------------------------------------------------------------------------------------------------------------------------------------------------------------------------------------------------------------------------------------------------------------------------------------------------------------------------|
| Kim J.M. et al.(2020)    | This study was supported by High Value-added Food Technology Development Program, Ministry of Agriculture, Food and Rural Affairs, Republic of Korea (312006-3) and by the Medical Research Center Program (No. 2011-0030074) through National Research Foundation (NRF) grant funded by the Korean government (MSIP).                                                                                                                                                                                                                                                |
| Kim S.P. et al. (2013)   | Not disclosed                                                                                                                                                                                                                                                                                                                                                                                                                                                                                                                                                         |
| Kim S.P. et al. (2014)   | Not disclosed                                                                                                                                                                                                                                                                                                                                                                                                                                                                                                                                                         |
| Kim S.P. et al. (2018)   | This work was supported by the Korean Institute of Planning and Evaluation for Technology in Food, Agricultural, Forestry and Fisheries (IPET) through Agri-Bio Industry Technology Development Program, funded by Ministry of Agriculture, Food and Rural Affairs (MAFRA) (no. 314019–3), and by the Korean Institute of Planning and Evaluation for Technology in Food, Agricultural, Forestry and Fisheries (IPET) through High Value-added Food Technology Development Program, funded by Ministry of Agriculture, Food and Rural Affairs (MAFRA) (no. 314076–3). |
| Lewis et al. (2020b)     | This work was supported by a gift from Daiwa Health Development. The study was also supported by Grant Number 1UL1TR000460, Miami Clinical and Translational Science Institute, from the National Center for Advancing Translational Sciences and the National Institute on Minority Health and Health Disparities.                                                                                                                                                                                                                                                   |
| Lewis et al. (2020a)     | This work was supported by a gift from Daiwa Health Development. The study was also supported by Grant Number 1UL1TR000460, Miami Clinical and Translational Science Institute, from the National Center for Advancing Translational Sciences and the National Institute on Minority Health and Health Disparities.                                                                                                                                                                                                                                                   |
| Lewis et al. (2020c)     | This work was supported by a gift from Daiwa Health Development. The study was also supported by (Grant no. 1UL1TR000460) Miami Clinical and Translational Science Institute from the National Center for Advancing Translational Sciences and the National Institute on Minority Health and Health Disparities.                                                                                                                                                                                                                                                      |
| Lissoni et al. (2008)    | Not disclosed                                                                                                                                                                                                                                                                                                                                                                                                                                                                                                                                                         |
| Markus et al. (2006)     | Not disclosed                                                                                                                                                                                                                                                                                                                                                                                                                                                                                                                                                         |
| Masood et al. (2013)     | Not disclosed                                                                                                                                                                                                                                                                                                                                                                                                                                                                                                                                                         |
| McDermott et al. (2006)  | The trial was funded by Daiwa Pharmaceutical Company. Dr George Lewith's post is funded by a grant from the Rufford Maurice Laing Foundation.                                                                                                                                                                                                                                                                                                                                                                                                                         |
| Meshitsuka (2013)        | Not disclosed                                                                                                                                                                                                                                                                                                                                                                                                                                                                                                                                                         |
| Miura et al. (2004/2013) | Not disclosed                                                                                                                                                                                                                                                                                                                                                                                                                                                                                                                                                         |
| Noaman et al. (2008)     | We thank Daiwa Pharmaceuticals, Co. Ltd, Tokyo, Japan, for generously providing the MGN-3.                                                                                                                                                                                                                                                                                                                                                                                                                                                                            |
| Ohara et al. (2000)      | This work was supported in part by Grant-in-Aid for scientific research from Kobe Women's University                                                                                                                                                                                                                                                                                                                                                                                                                                                                  |
| Ohara et al. (2002)      | Not disclosed                                                                                                                                                                                                                                                                                                                                                                                                                                                                                                                                                         |
| Okamura (2004)           | Not disclosed                                                                                                                                                                                                                                                                                                                                                                                                                                                                                                                                                         |

|                              |                                                                                                                                                                                                                                                                                                                                                                                                                                                                                                                                     |
|------------------------------|-------------------------------------------------------------------------------------------------------------------------------------------------------------------------------------------------------------------------------------------------------------------------------------------------------------------------------------------------------------------------------------------------------------------------------------------------------------------------------------------------------------------------------------|
| Ooi et al. (2020)            | Daiwa Pharmaceutical Co., Ltd. (Daiwa) provided financial funding to commence the RBAC-QoL project with the affiliating university of the corresponding author as the trial sponsor. BioMedica Nutraceuticals Pty Ltd (BioMedica) provided additional funding to conduct the gut microbiome study of this research. The RBAC and placebo powder will be manufactured and supplied by Daiwa. SLO is a recipient of the Australian Government Research Training Program scholarship for this study.                                   |
| Pérez-Martínez et al. (2015) | We thank Daiwa Pharmaceutical Co. Ltd., Tokyo, Japan, for providing us MGN-3/BioBran. This work was supported in part by the National Health Service of Spain grant FIS PI12/01622, Fundación de la Sociedad Española de HematoOncología Infantil and CRIS Cancer Foundation ( <a href="http://www.criscancer.org/en/index.php">http://www.criscancer.org/en/index.php</a> ) to Antonio Perez-Martínez and from the German Jose Carreras Leukemia Foundation and the German Childhood Cancer Foundation (DKS) to Matthias Pfeiffer. |
| Pescatore et al. (2022)      | Not disclosed                                                                                                                                                                                                                                                                                                                                                                                                                                                                                                                       |
| Petrovics et al. (2016)      | The Authors would like to acknowledge Daiwa Pharmaceutical Co. Ltd., Tokyo, Japan, for the technical material support of this project. (free samples of BioBran MGN-3). The manufacturers of BioBran funded the trial, but placed no restrictions on the design of the trial or on the publication of results.                                                                                                                                                                                                                      |
| Salama et al. (2016)         | Funding for the study and BioBran were provided by Daiwa Pharmaceutical Co., Ltd., Tokyo, Japan. This study was supported in part by NIH-NIMHD grant no. U54 MD007598 and NIH-NCATS grant no. UL1 TR000124.                                                                                                                                                                                                                                                                                                                         |
| Sudo et al. (2001)           | Not disclosed                                                                                                                                                                                                                                                                                                                                                                                                                                                                                                                       |
| Takahara & Sano (2004)       | We would like thank Daiwa Pharmaceutical for supplying MGN-3 (BioBran) and Mitsubishi Chemical Laboratory (B.C.L.) for cooperation in blood test.                                                                                                                                                                                                                                                                                                                                                                                   |
| Tan & Flores (2020)          | Research funding and Lentin and placebo sachets were provided by Daiwa Pharmaceuticals Co Ltd. Tokyo, Japan.                                                                                                                                                                                                                                                                                                                                                                                                                        |
| Tazawa et al. (2000)         | Not disclosed                                                                                                                                                                                                                                                                                                                                                                                                                                                                                                                       |
| Tazawa et al. (2003)         | Not disclosed                                                                                                                                                                                                                                                                                                                                                                                                                                                                                                                       |
| Tsunekawa (2004)             | Not disclosed                                                                                                                                                                                                                                                                                                                                                                                                                                                                                                                       |
| Yamada et al. (2002)         | Not disclosed                                                                                                                                                                                                                                                                                                                                                                                                                                                                                                                       |
| Yu et al. (2004)             | This work was supported by the fund of Eromlife Corporation.                                                                                                                                                                                                                                                                                                                                                                                                                                                                        |
| Zhao et al. (2020)           | This work was supported by the Li Jie-shou Gut Barrier Foundation, China (Project nos. LJS-201708 and LJS-201811C), the Wuxi Science and Technology Bureau, China (Project no.201827), the Wuxi Health and Family Planning Commission Youth Research Foundation, China                                                                                                                                                                                                                                                              |
| Zheng et al. (2012a)         | Not disclosed                                                                                                                                                                                                                                                                                                                                                                                                                                                                                                                       |
| Zheng et al. (2012b)         | Not disclosed                                                                                                                                                                                                                                                                                                                                                                                                                                                                                                                       |
| Zhu et al. (2017)            | Not disclosed                                                                                                                                                                                                                                                                                                                                                                                                                                                                                                                       |

---

*Table S4.4. Characteristics of trial registration included for assessment.*

| <b>Trial Citation</b>                                         | <b>Registry</b>    | <b>Year</b> | <b>Registration ID</b> | <b>Condition</b>                                 | <b>Product</b> | <b>Status</b> | <b>Research Output</b>                        |
|---------------------------------------------------------------|--------------------|-------------|------------------------|--------------------------------------------------|----------------|---------------|-----------------------------------------------|
| ClinicalTrials.gov (2009)                                     | ClinicalTrials.gov | 2009        | NCT01018381            | Liver cancer                                     | Biobran MGN-3  | Completed     | Bang et al. (2010)                            |
| University Hospital Medical Information Network Center (2010) | UMIN-CTR (Japan)   | 2010        | UMIN000004350          | Hep B & C<br>Gastroenteritis for cervical cancer | Biobran MGN-3  | Completed     | Itoh et al. (2015)                            |
| Clinical Research Information Service (2012)                  | CRiS (S. Korea)    | 2012        | KCT0000536             | Healthy                                          | RBEP           | Completed     | Choi et al. (2014)                            |
| ClinicalTrials.gov (2013)                                     | ClinicalTrials.gov | 2013        | NCT02019628            | Healthy                                          | Biobran MGN-3  | Completed     | Ali et al. (2012)                             |
| ClinicalTrials.gov (2014)                                     | ClinicalTrials.gov | 2014        | NCT02214173            | HIV                                              | Biobran MGN-3  | Completed     | Lewis et al. (2020a);<br>Lewis et al. (2020b) |
| ClinicalTrials.gov (2015)                                     | ClinicalTrials.gov | 2015        | NCT02568787            | Non-alcoholic liver disease                      | Biobran MGN-3  | Completed     | Lewis et al. (2020c)                          |
| ClinicalTrials.gov (2016a)                                    | ClinicalTrials.gov | 2016        | NCT02690103            | Hepatitis C infection                            | Biobran MGN-3  | Completed     | Salama et al. (2016)                          |
| ClinicalTrials.gov (2016b)                                    | ClinicalTrials.gov | 2016        | NCT02922907            | HIV                                              | Biobran MGN-3  | Completed     | Cadden et al. (2020)                          |
| Current Controlled Trials (2017)                              | ISRCTN (UK)        | 2017        | ISRCTN31318565         | Lyme borreliosis                                 | Biobran MGN-3  | Ongoing       |                                               |
| Clinical Research Information Service (2018)                  | CRiS (S. Korea)    | 2018        | KCT0002646             | Healthy                                          | STR RB-F       | Discontinued  | Trial interrupted by COVID-19 – no results.   |
| University Hospital Medical Information Network Center (2018) | UMIN-CTR (Japan)   | 2018        | UMIN000034569          | B-cell non-Hodgkin's lymphoma                    | Biobran MGN-3  | Completed     | Results pending                               |
| Australian New Zealand Clinical Trials Registry (2019)        | ANZCTR             | 2019        | ACTRN12619000562178    | Solid organ cancer                               | Biobran MGN-3  | Ongoing       | Ooi et al. (2020)                             |
| ClinicalTrials.gov (2020)                                     | ClinicalTrials.gov | 2020        | NCT04646980            | Influenza-like illnesses                         | Biobran MGN-3  | Completed     | Elsaid et al. (2021)                          |

*Table S4.5. Top 10 authors ranked by the total weighted coefficient (TWC) and article count.*

| Ranking By |       | Author                  | Affiliation                                     | Country     | Count (% Total) | TWC   |
|------------|-------|-------------------------|-------------------------------------------------|-------------|-----------------|-------|
| TWC        | Count |                         |                                                 |             |                 |       |
| 1          | 1     | Ghoneum, Mamdooh        | Charles Drew University of Medicine and Science | USA         | 30 (30.61%)     | 30.00 |
| 2          | 2     | Badr El-Din, Nariman K. | University of Mansoura                          | Egypt       | 9 (9.18%)       | 7.64  |
| 3          | 4     | Gollapudi, Sastry       | University of California at Irvine              | USA         | 6 (6.12%)       | 6.00  |
| 3          | 4     | Hajtó, Tibor            | University of Pécs                              | Hungary     | 6 (6.12%)       | 6.00  |
| 5          | 3     | Maeda, Hiroaki          | Daiwa Pharmaceutical Co. Ltd.                   | Japan       | 7 (7.14%)       | 5.36  |
| 6          | 4     | Egashira, Yukari        | Chiba University                                | Japan       | 6 (6.12%)       | 4.50  |
| 7          | 10    | Lewis, John E.          | University of Miami Miller School of Medicine   | USA         | 4 (4.08%)       | 4.00  |
| 8          | 4     | Hong, Seong Gil         | Erom Co. Ltd.                                   | South Korea | 6 (6.12%)       | 3.75  |
| 9          | -     | Elsaid, Ahmed F.        | Zagazig University                              | Egypt       | 3 (3.06%)       | 3.00  |
| 9          | -     | Friedman, Mendel        | U.S. Department of Agriculture                  | USA         | 3 (3.06%)       | 3.00  |
| 9          | -     | Kim, Sung Phil          | Ajou University                                 | South Korea | 3 (3.06%)       | 3.00  |
| 9          | -     | Konefal, Janet          | University of Miami Miller School of Medicine   | USA         | 3 (3.06%)       | 3.00  |
| 9          | -     | Nam, Seok Hyun          | Ajou University                                 | South Korea | 3 (3.06%)       | 3.00  |
| -          | 8     | Hwang, Sung Joo         | Erom Co. Ltd.                                   | South Korea | 5 (5.10%)       | 1.51  |
| -          | 8     | Lee, Seong Ae           | STR Biotech Co. Ltd.                            | South Korea | 5 (5.10%)       | 1.66  |
| -          | 10    | Ali, Doaa A.            | University of Mansoura                          | Egypt       | 4 (4.08%)       | 2.14  |
| -          | 10    | Kim, Hwa Young          | Erom Co. Ltd.                                   | South Korea | 4 (4.08%)       | 2.46  |
| -          | 10    | Kim, Jin Min            | Erom Co. Ltd.                                   | South Korea | 4 (4.08%)       | 0.79  |
| -          | 10    | Park, Mi Hyoun          | Erom Co. Ltd.                                   | South Korea | 4 (4.08%)       | 2.31  |
| -          | 10    | Shaheen, Magda          | Charles Drew University of Medicine and Science | USA         | 4 (4.08%)       | 1.42  |
| -          | 10    | Woolger, Judi M.        | University of Miami Miller School of Medicine   | USA         | 4 (4.08%)       | 0.27  |



Table S4.6. Cancer sites investigated by the included articles ordered by article count and breakdown by study design.

| #  | Cancer Site | Count (%)  | Preclinical (%) | Observational (%) | Interventional (%) |
|----|-------------|------------|-----------------|-------------------|--------------------|
| 1  | Various     | 9 (20%)    | -               | 2 (22.22%)        | 7 (77.78%)         |
| 2  | Breast      | 8 (17.78%) | 4 (50%)         | 3 (37.5%)         | 1 (12.5%)          |
| 3  | Liver       | 5 (11.11%) | 2 (40%)         | -                 | 2 (50%)            |
| 4  | Blood *     | 4 (8.89%)  | 2 (50%)         | -                 | 2 (50%)            |
| 5  | Colorectal  | 2 (4.44%)  | -               | 2 (100%)          | -                  |
| 6  | Lung        | 2 (4.44%)  | -               | 2 (100%)          | -                  |
| 7  | Ovary       | 2 (4.44%)  | -               | 2 (100%)          | -                  |
| 8  | Stomach     | 2 (4.44%)  | 1 (50%)         | 1 (50%)           | -                  |
| 9  | Skin        | 2 (4.44%)  | 1 (50%)         | 1 (50%)           | -                  |
| 10 | Cervical    | 1 (2.22%)  | -               | -                 | 1 (100%)           |
| 11 | Head & Neck | 1 (2.22%)  | -               | -                 | 1 (100%)           |
| 12 | Bile Duct   | 1 (2.22%)  | -               | 1 (100%)          | -                  |
| 13 | Pancreatic  | 1 (2.22%)  | -               | 1 (100%)          | -                  |
| 14 | Umbilical   | 1 (2.22%)  | -               | 1 (100%)          | -                  |
| 15 | Uterus      | 1 (2.22%)  | -               | 1 (100%)          | -                  |
| 16 | Prostate    | 1 (2.22%)  | 1 (100%)        | -                 | -                  |

**Note:** \* cancer of the blood includes multiple myeloma, leukemia, and early B-cell lymphoid malignancies.

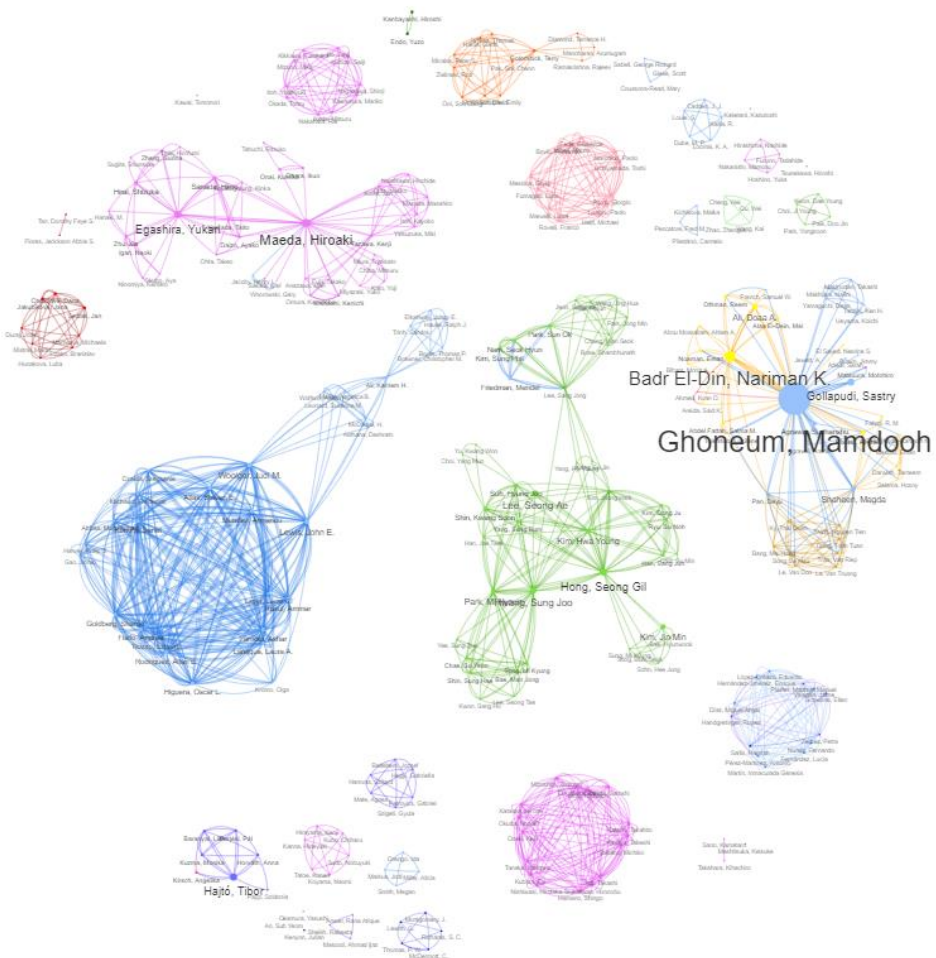

Fig. S4.1. The collaborative network of authors in RBAC research. The interactive version is available online at <http://resource.rbac-qol.info>.

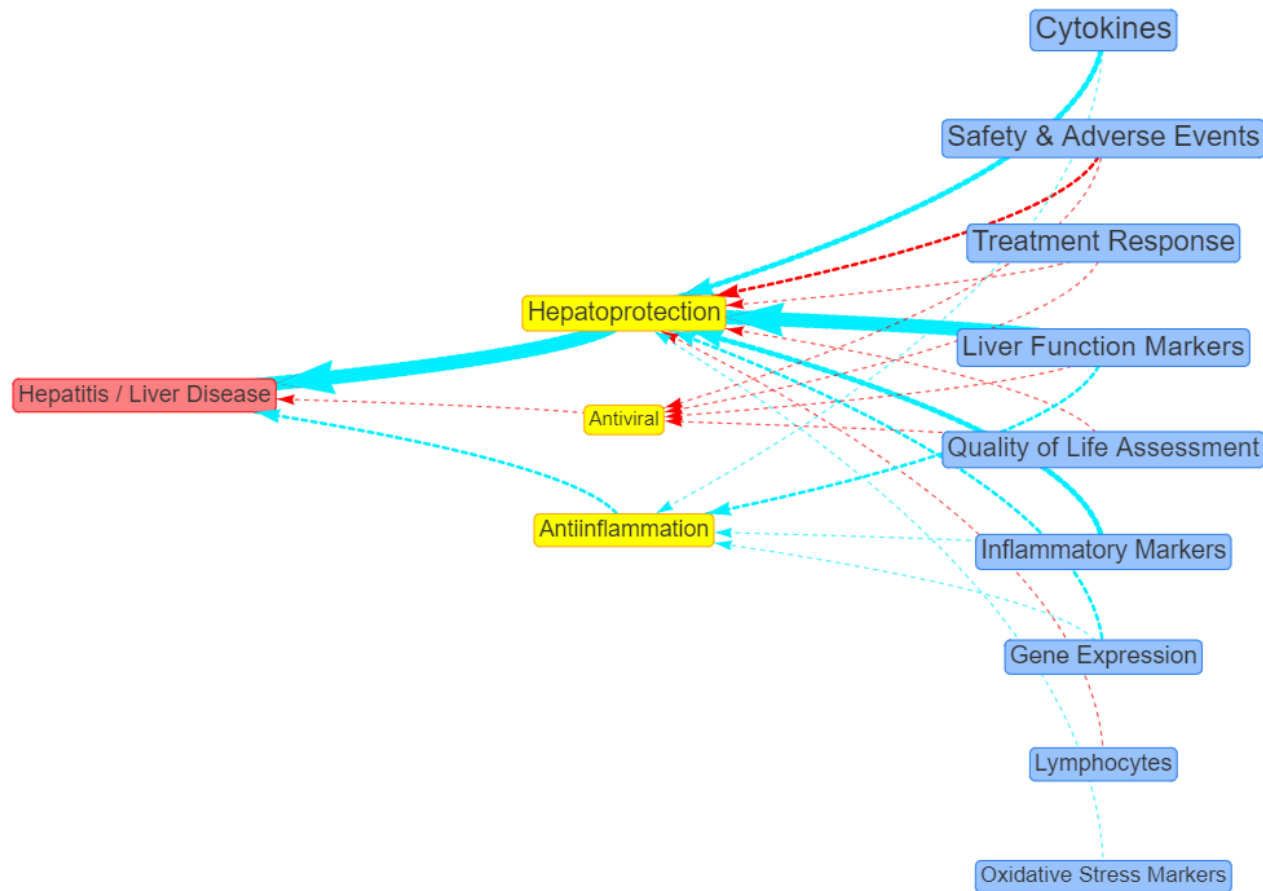

Fig. S4.2. Network visualisation of the beneficial actions (yellow nodes) of RBAC in hepatitis and liver diseases (red node) and its associated positive outcomes (blue). The links between nodes represent the availability of sources of evidence, with the colours indicating the study types (red = interventional, green = observational, and blue = preclinical). The node size and link thickness reflect the number of sources. The original interactive network diagram is available at <https://resource.rbac-qol.info>.

Supplementary S7. Full citation of all included articles and trial registrations in APA 7<sup>th</sup> format

References

- Ali, K. H., Melillo, A. B., Leonard, S. M., Asthana, D., Woolger, J. M., Wolfson, A. H., McDaniel, H., & Lewis, J. E. (2012). An open-label, randomized clinical trial to assess the immunomodulatory activity of a novel oligosaccharide compound in healthy adults. *Functional Foods in Health and Disease*, 2(7), 265.
- An, S. Y. (2011). *Immune-enhance and anti-tumor effect of exo-biopolymer extract from submerged culture of Lentinus edodes with rice bran* [Doctoral Thesis, Korea University]. Seoul, Republic of Korea.
- Australian New Zealand Clinical Trials Registry. (2019). *Rice bran arabinoxylan compound and quality of life of cancer patients (RBAC-QoL)*. Australian New Zealand Clinical Trials Registry. Retrieved 2022-12-01 from <https://www.anzctr.org.au/Trial/Registration/TrialReview.aspx?id=377340&isReview=true>
- Badr El-Din, N. K., Abdel Fattah, S. M., Pan, D., Tolentino, L., & Ghoneum, M. (2016a). Chemopreventive activity of MGN-3/Biobran against chemical induction of glandular stomach carcinogenesis in rats and its apoptotic effect in gastric cancer cells. *Integrative Cancer Therapies*, 15(4), NP26-NP34. <https://doi.org/10.1177/1534735416642287>
- Badr El-Din, N. K., Ali, D. A., Alaa El-Dein, M., & Ghoneum, M. (2016b). Enhancing the apoptotic effect of a low dose of paclitaxel on tumor cells in mice by arabinoxylan rice bran (MGN-3/Biobran). *Nutrition and Cancer*, 68(6), 1010-1020. <https://doi.org/10.1080/01635581.2016.1192204>
- Badr El-Din, N. K., Ali, D. A., & Othman, R. M. (2016c). Inhibition of experimental carcinogenesis by the bioactive natural product Biobran. *Journal of Plant Protection and Pathology*, 7(1), 85-91. <https://doi.org/10.21608/jppp.2016.50064>
- Badr El-Din, N. K., Ali, D. A., Othman, R. M., French, S. W., & Ghoneum, M. (2020). Chemopreventive role of arabinoxylan rice bran, MGN-3/Biobran, on liver carcinogenesis in rats. *Biomedicine & Pharmacotherapy*, 126, 110064. <https://doi.org/10.1016/j.biopha.2020.110064>

- Badr El-Din, N. K., Areida, S. K., Ahmed, K. O., & Ghoneum, M. (2019). Arabinoxylan rice bran (MGN-3/Biobran) enhances radiotherapy in animals bearing Ehrlich ascites carcinoma. *Journal of Radiation Research*, 60(6), 747-758. <https://doi.org/10.1093/jrr/rrz055>
- Badr El-Din, N. K., Noaman, E., & Ghoneum, M. (2008). In vivo tumor inhibitory effects of nutritional rice bran supplement MGN-3/Biobran on Ehrlich carcinoma-bearing mice. *Nutrition and Cancer*, 60(2), 235-244. <https://doi.org/10.1080/01635580701627285>
- Bae, M. J., Lee, S. T., Chae, S. Y., Shin, S. H., Kwon, S. H., Park, M. H., Song, M. Y., & Hwang, S. J. (2004). The effects of the arabinoxylane and the polysaccharide peptide (PSP) on the antiallergy, anticancer. *Journal of the Korean Society of Food Science and Nutrition*, 33(3), 469-474. <https://doi.org/10.3746/jkfn.2004.33.3.469>
- Bang, M. H., Tran, V. R., Thinh, N. T., Song, L. H., Dung, T. T., Le, V. T., Le, V. D., Ky, T. D., Pan, D., Shaheen, M., & Ghoneum, M. (2010). Arabinoxylan rice bran (MGN-3) enhances the effects of interventional therapies for the treatment of hepatocellular carcinoma: a three-year randomized clinical trial. *Anticancer Research*, 30(12), 5145-5151.
- Brush, T. P., Trinh, S., Brawner, C. M., Ali, K. H., Hauke, R. J., & Elkahwaji, J. E. (2010). RBAC, a modified form of Arabinoxylan from rice bran, impairs prostate cancer cell line proliferation, adhesion, and invasion in vitro [Abstract]. *Cancer Research*, 70(8), 5662-5662. <https://doi.org/10.1158/1538-7445.AM10-5662>
- Cadden, J. J., Loomis, K. A., Kallia, R., Louie, S., & Dube, M. P. (2020). Anti-inflammatory effects of arabinoxylan rice bran supplementation in participants with treated, suppressed HIV infection and inadequate immune reconstitution: a randomized, doubleblind trial [Abstract]. *Antiviral Therapy*, 25(Suppl 1), A26.
- Chae, S. Y., Shin, S. H., Bae, M. J., Park, M. H., Song, M. K., Hwang, S. J., & Yee, S. T. (2004). Effect of arabinoxylane and PSP on activation of immune cells. *Journal of the Korean Society of Food Science and Nutrition*, 33(2), 278-286. <https://doi.org/10.3746/jkfn.2004.33.2.278>
- Choi, J. Y., Paik, D. J., Kwon, D. Y., & Park, Y. (2014). Dietary supplementation with rice bran fermented with *Lentinus edodes* increases interferon- $\gamma$  activity without causing adverse effects: a randomized, double-blind, placebo-controlled, parallel-group study. *Nutrition Journal*, 13, 35. <https://doi.org/10.1186/1475-2891-13-35>

- Cholujova, D., Jakubikova, J., Czako, B., Martisova, M., Hunakova, L., Duraj, J., Mistrik, M., & Sedlak, J. (2013). MGN-3 arabinoxylan rice bran modulates innate immunity in multiple myeloma patients. *Cancer Immunology, Immunotherapy*, 62(3), 437-445. <https://doi.org/10.1007/s00262-012-1344-z>
- Cholujova, D., Jakubikova, J., & Sedlak, J. (2009). BioBran-augmented maturation of human monocyte-derived dendritic cells. *Neoplasma*, 56(2), 89-95. [https://doi.org/10.4149/neo\\_2009\\_02\\_89](https://doi.org/10.4149/neo_2009_02_89)
- Chung, W. S., Wang, J. H., Bose, S., Park, J. M., Park, S. O., Lee, S. J., Jeon, S., & Kim, H. (2015). Hepatoprotective effect of *Lentinus edodes* mycelia fermented formulation against alcoholic liver injury in rats. *Journal of Food Biochemistry*, 39(3), 251-262. <https://doi.org/10.1111/jfbc.12124>
- Clinical Research Information Service. (2012). *Effects of ingestion of fermented rice bran powder on immune function in healthy adults*. Clinical Research Information Service (CRiS) of Republic of Korea <https://cris.nih.go.kr/cris/search/listDetail.do?searchWord=KCT0000536>
- Clinical Research Information Service. (2018). *A 8 week, randomized, double-blind, Placebo-controlled clinical trial of RB-F for the evaluation of efficacy and safety on immune function*. Clinical Research Information Service (CRiS) of Republic of Korea <https://cris.nih.go.kr/cris/search/listDetail.do?searchWord=KCT0002646>
- ClinicalTrials.gov. (2009). *Arabinoxylan rice bran (MGN-3/Biobran) for the treatment of hepatocellular carcinoma and hepatitis B and C infection*. National Library of Medicine (US). <https://clinicaltrials.gov/show/NCT01018381>
- ClinicalTrials.gov. (2013). *Enhanced natural killer cell activity and RBAC*. National Library of Medicine (US). <https://clinicaltrials.gov/show/NCT02019628>
- ClinicalTrials.gov. (2014). *The effect of an enhanced rice bran nutritional supplement in HIV(BRM4)*. National Library of Medicine (US). <https://clinicaltrials.gov/ct2/show/NCT02214173>
- ClinicalTrials.gov. (2015). *The effect of an RBAC supplement (BRM4) on NAFLD*. National Library of Medicine (US). <https://clinicaltrials.gov/show/NCT02568787>

ClinicalTrials.gov. (2016a). *Response modifier (arabinoxylan rice bran/mgn-3/biobran) with interferon-alpha for for HCV*. National Library of Medicine (US). <https://clinicaltrials.gov/show/NCT02690103>

ClinicalTrials.gov. (2016b). *Rice bran supplementation in treated HIV infection*. National Library of Medicine (US). <https://clinicaltrials.gov/show/NCT02922907>

ClinicalTrials.gov. (2020). *Biobran/MGN-3 increases innate resistance and reduces the incidence of influenza-like illnesses*. National Library of Medicine (US). <https://clinicaltrials.gov/show/NCT04646980>

Current Controlled Trials. (2017). *Trial of the functional food Biobran in patients with persistent symptoms attributed to Lyme borreliosis*. BioMed Central. <https://www.isrctn.com/ISRCTN31318565>

Daizo, A., Yamada, T., Egashira, Y., Maeda, H., Ohta, T., & Sanada, H. (2001). Effect of enzymatically treated rice bran hemicellulose (MGN-3) on experimental galactosamine liver injury in rats [Abstract]. *Journal of Japanese Association for Dietary Fiber Research*, 5(2), 48-48. [https://doi.org/10.11217/jjdf1997.5.2\\_43](https://doi.org/10.11217/jjdf1997.5.2_43)

Egashira, Y., Hanaki, M., Hirai, S., Zhu, X., & Igari, N. (2013). Suppressive effect of hydrolyzed rice bran (HRB) on D-galactosamine/ LPS induced IL-18 and hepatitis by inhibition of NF-kappa B pathway in mice [Abstract]. *Annals of Nutrition and Metabolism*, 63(Suppl 1), 1700-1701. <https://doi.org/10.1159/000354245>

Elsaid, A. F., Agrawal, S., Agrawal, A., & Ghoneum, M. (2021). Dietary supplementation with Biobran/MGN-3 increases innate resistance and reduces the incidence of influenza-like illnesses in elderly subjects: a randomized, double-blind, placebo-controlled pilot clinical trial. *Nutrients*, 13(11). <https://doi.org/10.3390/nu13114133>

Elsaid, A. F., Fahmi, R. M., Shaheen, M., & Ghoneum, M. (2020). The enhancing effects of Biobran/MGN-3, an arabinoxylan rice bran, on healthy old adults' health-related quality of life: a randomized, double-blind, placebo-controlled clinical trial. *Quality of Life Research*, 29(2), 357-367. <https://doi.org/10.1007/s11136-019-02286-7>

- Elsaid, A. F., Shaheen, M., & Ghoneum, M. (2018). Biobran/MGN-3, an arabinoxylan rice bran, enhances NK cell activity in geriatric subjects: A randomized, double-blind, placebo-controlled clinical trial. *Experimental and Therapeutic Medicine*, 15(3), 2313-2320. <https://doi.org/10.3892/etm.2018.5713>
- Endo, Y., & Kanbayashi, H. (2003). Modified rice bran beneficial for weight loss of mice as a major and acute adverse effect of cisplatin. *Pharmacology and Toxicology*, 92(6), 300-303. <https://doi.org/10.1034/j.1600-0773.2003.920608.x>
- Ghoneum, M. (1998a). Anti-HIV activity in vitro of MGN-3, an activated arabinoxylane from rice bran. *Biochemical and Biophysical Research Communications*, 243(1), 25-29.
- Ghoneum, M. (1998b). Enhancement of human natural killer cell activity by modified arabinoxylane from rice bran (MGN-3). *International Journal of Immunotherapy*, 14(2), 89-99.
- Ghoneum, M. (1999, Dec 11-13). *Immunostimulation and cancer prevention* [Abstract]. 7th International Congress on Anti-Aging & Biomedical Technologies, Las Vegas, NV, USA.
- Ghoneum, M., & Abedi, S. (2004). Enhancement of natural killer cell activity of aged mice by modified arabinoxylan rice bran (MGN-3/Biobran). *Journal of Pharmacy and Pharmacology*, 56(12), 1581-1588. <https://doi.org/10.1211/0022357044922>
- Ghoneum, M., & Agrawal, S. (2011). Activation of human monocyte-derived dendritic cells in vitro by the biological response modifier arabinoxylan rice bran (MGN-3/Biobran). *International Journal of Immunopathology and Pharmacology*, 24(4), 941-948. <https://doi.org/10.1177/039463201102400412>
- Ghoneum, M., & Agrawal, S. (2014). MGN-3/biobran enhances generation of cytotoxic CD8+ T cells via upregulation of DEC-205 expression on dendritic cells. *International Journal of Immunopathology and Pharmacology*, 27(4), 523-530. <https://doi.org/10.1177/039463201402700408>
- Ghoneum, M., Badr El-Din, N. K., Abdel Fattah, S. M., & Tolentino, L. (2013). Arabinoxylan rice bran (MGN-3/Biobran) provides protection against whole-body gamma -irradiation in mice via restoration of hematopoietic tissues. *Journal of Radiation Research*, 54(3), 419-429. <https://doi.org/10.1093/jrr/rrs119>



- Ghoneum, M., Badr El-Din, N. K., Ali, D. A., & Alaa El-Dein, M. (2014). Modified arabinoxylan from rice bran, MGN-3/Biobran, sensitizes metastatic breast cancer cells to paclitaxel in vitro. *Anticancer Research*, 34(1A), 81-87.
- Ghoneum, M., & Brown, J. (1999). NK Immunorestitution and cancer patients by MGN-3, a modified arabinoxylan rice bran (Study of 32 patients followed for up to 4 years). In R. M. Klatz & R. Goldman (Eds.), *Anti-aging Medical Therapeutics* (Vol. III, pp. 217-226). Health Quest Publications.
- Ghoneum, M., & El Sayed, N. S. (2021). Protective effect of Biobran/MGN-3 against sporadic Alzheimer's disease mouse model: possible role of oxidative stress and apoptotic pathways. *Oxidative Medicine and Cellular Longevity*, 2021. <https://doi.org/10.1155/2021/8845064>
- Ghoneum, M., & Gollapudi, S. (2003). Modified arabinoxylan rice bran (MGN-3/Biobran) sensitizes human T cell leukemia cells to death receptor (CD95)-induced apoptosis. *Cancer Letters*, 201(1), 41-49. [https://doi.org/10.1016/s0304-3835\(03\)00458-0](https://doi.org/10.1016/s0304-3835(03)00458-0)
- Ghoneum, M., & Gollapudi, S. (2005a). Modified arabinoxylan rice bran (MGN-3/Biobran) enhances yeast-induced apoptosis in human breast cancer cells in vitro. *Anticancer Research*, 25(2a), 859-870.
- Ghoneum, M., & Gollapudi, S. (2005b). Synergistic role of arabinoxylan rice bran (MGN-3/Biobran) in *S. cerevisiae*-induced apoptosis of monolayer breast cancer MCF-7 cells. *Anticancer Research: International Journal of Cancer Research and Treatment*, 25(6b), 4187-4196.
- Ghoneum, M., & Gollapudi, S. (2011). Synergistic apoptotic effect of arabinoxylan rice bran (MGN-3/Biobran) and curcumin (turmeric) on human multiple myeloma cell line U266 in vitro. *Neoplasma*, 58(2), 118-123. [https://doi.org/10.4149/neo\\_2011\\_02\\_118](https://doi.org/10.4149/neo_2011_02_118)
- Ghoneum, M., & Jewett, A. (2000). Production of tumor necrosis factor-alpha and interferon-gamma from human peripheral blood lymphocytes by MGN-3, a modified arabinoxylan from rice bran, and its synergy with interleukin-2 in vitro. *Cancer Detection and Prevention*, 24(4), 314-324.
- Ghoneum, M., & Matsuura, M. (2004). Augmentation of macrophage phagocytosis by modified arabinoxylan rice bran (MGN-3/biobran). *International Journal of Immunopathology and Pharmacology*, 17(3), 283-292. <https://doi.org/10.1177/039463200401700308>

- Ghoneum, M., Matsuura, M., & Gollapudi, S. (2008). Modified arabinoxylan rice bran (MGN-3/Biobran) enhances intracellular killing of microbes by human phagocytic cells in vitro. *International Journal of Immunopathology and Pharmacology*, 21(1), 87-95. <https://doi.org/10.1177/039463200802100110>
- Ghoneum, M., Tachiki, K. H., Ueyama, K., Makinodan, T., Makhijani, N., & Yamaguchi, D. (2000, Dec 14-17). *Natural biological response modifier (MGN-3) shown to be effective against tumor cell growth* [Abstract]. 8th International Congress on Anti-Aging & Biomedical Technologies, Las Vegas, NV, USA.
- Giese, S., Sabell, G. R., & Coussons-Read, M. (2008). Impact of ingestion of rice bran and shitake mushroom extract on lymphocyte function and cytokine production in healthy rats. *Journal of Dietary Supplements*, 5(1), 47-61. <https://doi.org/10.1080/19390210802329196>
- Gollapudi, S., & Ghoneum, M. (2008). MGN-3/Biobran, modified arabinoxylan from rice bran, sensitizes human breast cancer cells to chemotherapeutic agent, daunorubicin. *Cancer Detection and Prevention*, 32(1), 1-6. <https://doi.org/10.1016/j.cdp.2008.02.006>
- Golombick, T., Diamond, T. H., Manoharan, A., & Ramakrishna, R. (2016). Addition of rice bran arabinoxylan to curcumin therapy may be of benefit to patients with early-stage B-cell lymphoid malignancies (monoclonal gammopathy of undetermined significance, smoldering multiple myeloma, or stage 0/1 chronic lymphocytic leukemia). *Integrative Cancer Therapies*, 15(2), 183-189. <https://doi.org/10.1177/1534735416635742>
- Hajtó, T. (2017). Can a standardized plant immunomodulator (rice bran arabinoxylan concentrate/MGN-3) increase the effects of MEK and BRAF inhibitors with clinical benefit? Case report of a patient with carcinoma in biliary duct. *Research and Review Insights*, 1(3), 1-4. <https://doi.org/10.15761/rri.1000115>
- Hajtó, T. (2018). New perspectives to improve the MHC-I unrestricted immune mechanisms against malignant tumors. *Advances in Clinical and Translational Research*, 2(3), 100014.
- Hajtó, T., Baranyai, L., Kirsch, A., Kuzma, M., & Perjési, P. (2015). Can a synergistic activation of pattern recognition receptors by plant immunomodulators enhance the effect of oncologic therapy? Case Report of a patient with uterus and ovary sarcoma. *Clinical Case Reports and Reviews*, 1(10), 235-238. <https://doi.org/10.15761/CCRR.1000176>

- Hajtó, T., Horváth, A., Baranyai, L., Kuzma, M., & Perjési, P. (2016a). Can the EGFR inhibitors increase the immunomodulatory effects of standardized plant extracts (mistletoe lectin and arabinoxylan) with clinical benefit? Case report of a patient with lung adenocarcinoma. *Clinical Case Reports and Reviews*, 2(6), 456-459. <https://doi.org/10.15761/CCRR.1000244>
- Hajtó, T., Horváth, A., & Papp, S. (2016b). Improvement of quality of life in tumor patients after an immunomodulatory treatment with standardized mistletoe lectin and arabinoxylan plant extracts. *International Journal of Neurorehabilitation*, 3(2), 2-4. <https://doi.org/10.4172/2376-0281.1000205>
- Hajtó, T., & Kirsch, A. (2013). Case reports of cancer patients with hepatic metastases treated by standardized plant immunomodulatory preparations. *Journal of Cancer Research Updates*, 2(1), 1-9. <https://doi.org/10.6000/1929-2279.2013.02.01.1>
- Hoshino, Y., Hirashima, N., Nakanishi, M., & Furuno, T. (2010). Inhibition of degranulation and cytokine production in bone marrow-derived mast cells by hydrolyzed rice bran. *Inflammation Research*, 59(8), 615-625. <https://doi.org/10.1007/s00011-010-0173-9>
- Ichihashi, K. (2004). Experience with administration of BioBran in patients with chronic rheumatism. *Clinical Pharmacology and Therapy*, 14(4), 459-463.
- Itoh, Y., Mizuno, M., Ikeda, M., Nakahara, R., Kubota, S., Ito, J., Okada, T., Kawamura, M., Kikkawa, F., & Naganawa, S. (2015). A randomized, double-blind pilot trial of hydrolyzed rice bran versus placebo for radioprotective effect on acute gastroenteritis secondary to chemoradiotherapy in patients with cervical cancer. *Evidence-based Complementary and Alternative Medicine*, 974390-974390. <https://doi.org/10.1155/2015/974390>
- Jacoby, H. I., Wnorowski, G., Sakata, K., & Maeda, H. (2001). The effect of MGN-3 on cisplatin and doxorubicin induced toxicity in the rat. *Journal of Nutraceuticals, Functional & Medical Foods*, 3(4), 3-11. [https://doi.org/10.1300/J133v03n04\\_02](https://doi.org/10.1300/J133v03n04_02)
- Kaketani, K. (2004). A case where an immunomodulatory food was effective in conservative therapy for progressive terminal pancreatic cancer. *Clinical Pharmacology and Therapy*, 14(3), 273-279.

- Kambayashi, H., & Endo, Y. (2002). Evaluation of the effects of asthma prevention and symptom reduction by enzymatically modified rice-bran foods in asthmatic model mice [Abstract] *Japanese Journal of Allergology*, 51(9/10), 957-957. [https://doi.org/10.15036/arerugi.51.957\\_3](https://doi.org/10.15036/arerugi.51.957_3)
- Kamiya, T., Shikano, M., Tanaka, M., Ozeki, K., Ebi, M., Katano, T., Hamano, S., Nishiwaki, H., Tsukamoto, H., Mizoshita, T., Mori, Y., Kubota, E., Tanida, S., Kataoka, H., Okuda, N., & Joh, T. (2014). Therapeutic effects of Biobran, modified arabinoxylan rice bran, in improving symptoms of diarrhea predominant or mixed type irritable bowel syndrome: a pilot, randomized controlled study. *Evidence-Based Complementary and Alternative Medicine*, 2014. <https://doi.org/10.1155/2014/828137>
- Kang, S. J., Yang, H. Y., Lee, S. J., Kim, J. H., Hwang, S. J., & Hong, S. G. (2022). Immunostimulatory effect of rice bran fermented by *lentinus edodes* mycelia on mouse macrophages and splenocytes. *Journal of the Korean Society of Food Science and Nutrition*, 51(8), 743-750. <https://doi.org/10.3746/jkfn.2022.51.8.743>
- Kawai, T. (2004). One case of a patient with umbilical metastasis of recurrent cancer (Sister Mary Joseph's Nodule, SMJN) who has survived for a long time under immunomodulatory supplement therapy. *Clinical Pharmacology and Therapy*, 14(3), 281-288.
- Kenyon, J. (2001, Nov). A descriptive questionnaire-based study on the use of Biobran (MGN3), in chronic fatigue syndrome. *Townsend Letter for Doctors and Patients*, (220), 48-50.
- Kim, D. J., Choi, S. M., Kim, H. Y., Kim, J. H., Ryu, S. N., Han, S. J., & Hong, S. G. (2011a). Evaluation of biological activities of fermented rice bran from novel black colored rice cultivar SuperC3GHi. *Korean Journal of Crop Science*, 56(4), 420-426.
- Kim, D. J., Ryu, S.-N., Han, S. J., Kim, H. Y., Kim, J. H., & Hong, S. G. (2011b). In vivo immunological activity in fermentation with black rice bran. *The Korean Journal of Food And Nutrition*, 24(3), 273-281. <https://doi.org/10.9799/KSFAN.2011.24.3.273>
- Kim, H. Y., Han, J. T., Hong, S. G., Yang, S. B., Hwang, S. J., Shin, K. S., Suh, H. J., & Park, M. H. (2005). Enhancement of immunological activity in exo-biopolymer from submerged culture of *Lentinus edodes* with rice bran. *Natural Product Sciences*, 11(3), 183-187.

- Kim, H. Y., Kim, J. H., Yang, S. B., Hong, S. G., Lee, S. A., Hwang, S. J., Shin, K. S., Suh, H. J., & Park, M. H. (2007). A polysaccharide extracted from rice bran fermented with *Lentinus edodes* enhances natural killer cell activity and exhibits anticancer effects. *Journal of Medicinal Food*, 10(1), 25-31. <https://doi.org/10.1089/jmf.2006.116>
- Kim, J. M., Hong, S. G., Song, B. S., Sohn, H. J., Baik, H., & Sung, M. K. (2020). Efficacy of cereal-based oral nutrition supplement on nutritional status, inflammatory cytokine secretion and quality of life in cancer patients under cancer therapy. *Journal of Cancer Prevention*, 25(1), 55-63. <https://doi.org/10.15430/JCP.2020.25.1.55>
- Kim, S. P., Lee, S. J., Nam, S. H., & Friedman, M. (2018). The composition of a bioprocessed shiitake (*Lentinus edodes*) mushroom mycelia and rice bran formulation and its antimicrobial effects against *Salmonella enterica* subsp. *enterica* serovar Typhimurium strain SL1344 in macrophage cells and in mice. *BMC Complementary and Alternative Medicine*, 18(1). <https://doi.org/10.1186/s12906-018-2365-8>
- Kim, S. P., Park, S. O., Lee, S. J., Nam, S. H., & Friedman, M. (2013). A polysaccharide isolated from the liquid culture of *Lentinus edodes* (Shiitake) mushroom mycelia containing black rice bran protects mice against a *Salmonella* lipopolysaccharide-induced endotoxemia. *Journal of Agricultural and Food Chemistry*, 61(46), 10987-10994. <https://doi.org/10.1021/jf403173k>
- Kim, S. P., Park, S. O., Lee, S. J., Nam, S. H., & Friedman, M. (2014). A polysaccharide isolated from the liquid culture of *Lentinus edodes* (Shiitake) mushroom mycelia containing black rice bran protects mice against salmonellosis through upregulation of the Th1 immune reaction. *Journal of Agricultural and Food Chemistry*, 62(11), 2384-2391. <https://doi.org/10.1021/jf405223q>
- Lewis, J. E., Atlas, S. E., Abbas, M. H., Rasul, A., Farooqi, A., Lantigua, L. A., Michaud, F., Goldberg, S., Lages, L. C., Gao, J., Higuera, O. L., Fiallo, A., Harvey, P. D., Tiozzo, E., Woolger, J. M., Ciraula, S., Mendez, A., Rodriguez, A. E., & Konefal, J. (2020a). Cardiovascular, endothelial function, and immune markers in response to treatment with a polysaccharide in HIV(+) adults in a randomized, double-blind placebo-controlled trial. *Journal of Clinical and Translational Research*, 5(3), 140-147.
- Lewis, J. E., Atlas, S. E., Abbas, M. H., Rasul, A., Farooqi, A., Lantigua, L. A., Michaud, F., Goldberg, S., Lages, L. C., Higuera, O. L., Fiallo, A., Tiozzo, E., Woolger, J. M., Ciraula, S., Mendez, A., Rodriguez, A. E., & Konefal, J. (2020b). The novel effects of a hydrolyzed polysaccharide dietary supplement on immune, hepatic, and renal function in adults with HIV in a randomized, double-blind, placebo-control trial. *Journal of Dietary Supplements*, 17(4), 429-441. <https://doi.org/10.1080/19390211.2019.1619010>

- Lewis, J. E., Atlas, S. E., Higuera, O. L., Fiallo, A., Rasul, A., Farooqi, A., Kromo, O., Lantigua, L. A., Tiozzo, E., Woolger, J. M., Goldberg, S., Mendez, A., Rodriguez, A. E., & Konefal, J. (2020c). Corrigendum to "The Effect of a Hydrolyzed Polysaccharide Dietary Supplement on Biomarkers in Adults with Nonalcoholic Fatty Liver Disease". *Evidence-Based Complementary and Alternative Medicine*, 2020, 10. <https://doi.org/10.1155/2020/9575878>
- Lissoni, P., Messina, G., Brivio, F., Fumagalli, L., Rovelli, F., Maruelli, L., Miceli, M., Marchiori, P., Porro, G., Held, M., Fede, G., & Uchiyamada, T. (2008). Modulation of the anticancer immunity by natural agents: inhibition of T regulatory lymphocyte generation by arabinoxylan in patients with locally limited or metastatic solid tumors. *Cancer Therapy*, 6(2), 1011-1016.
- Markus, J., Miller, A., Smith, M., & Orengo, I. (2006). Metastatic hemangiopericytoma of the skin treated with wide local excision and MGN-3. *Dermatologic Surgery*, 32(1), 145-147. <https://doi.org/10.1111/1524-4725.2006.32023>
- Masood, A. I., Sheikh, R., & Anwer, R. A. (2013). "BIOBRAN MGN-3"; Effect of reducing side effects of chemotherapy in breast cancer patients. *The Professional Medical Journal*, 20(1), 13-16.
- McDermott, C., Richards, S. C., Thomas, P. W., Montgomery, J., & Lewith, G. (2006). A placebo-controlled, double-blind, randomized controlled trial of a natural killer cell stimulant (BioBran MGN-3) in chronic fatigue syndrome. *QJM: An International Journal of Medicine*, 99(7), 461-468. <https://doi.org/10.1093/qjmed/hcl063>
- Meshitsuka, K. (2013). A case of stage IV hepatocellular carcinoma treated by KM900, Biobran, and psychotherapy has presented significant good results. *Personalized Medicine Universe (Japanese Edition)*, 1(1), 46-48.
- Miura, T., Chiba, M., Miyazaki, Y., Kato, Y., & Maeda, H. (2004/2013). Chemical structure of the component involved in immunoregulation. In *BioBran/MGN-3 (Rice Bran Arabinoxylan Coumpound): Basic and clinical application to integrative medicine* (2nd ed., pp. 14-22). BioBran Research Foundation. (Reprinted from a report of 2004 Annual Meeting of the Japanese society of Applied Glycoscience.)
- Noaman, E., Badr El-Din, N. K., Bibars, M. A., Abou Mossallam, A. A., & Ghoneum, M. (2008). Antioxidant potential by arabinoxylan rice bran, MGN-3/biobran, represents a mechanism for its oncostatic effect against murine solid Ehrlich carcinoma. *Cancer Letters*, 268(2), 348-359. <https://doi.org/10.1016/j.canlet.2008.04.012>

- Ohara, I., Onai, K., & Maeda, H. (2002). Modified rice bran improves glucose tolerance in NIDDM adult rats given streptozotocin as neonates. *Aichi Gakusen University Research Studies*, 37, 17-23.
- Ohara, I., Tabuchi, R., & Onai, K. (2000). Effects of modified rice bran on serum lipids and taste preference in streptozotocin-induced diabetic rats. *Nutrition research*, 20(1), 59-68. [https://doi.org/10.1016/S0271-5317\(99\)00138-4](https://doi.org/10.1016/S0271-5317(99)00138-4)
- Okamura, Y. (2004). The clinical significance of Biobran in the immunotherapy for cancer. *Clinical Pharmacology and Therapy*, 14(3), 289-294.
- Ooi, S. L., Pak, S. C., Micalos, P. S., Schupfer, E., Zielinski, R., Jeffries, T., Harris, G., Golombick, T., & McKinnon, D. (2020). Rice bran arabinoxylan compound and quality of life of cancer patients (RBAC-QoL): Study protocol for a randomized pilot feasibility trial. *Contemporary Clinical Trials Communications*, 19, 100580. <https://doi.org/10.1016/j.conctc.2020.100580>
- Pérez-Martínez, A., Valentín, J., Fernández, L., Hernández-Jiménez, E., López-Collazo, E., Zerbes, P., Schwörer, E., Nuñez, F., Martín, I. G., Sallis, H., Díaz, M. Á., Handgretinger, R., & Pfeiffer, M. M. (2015). Arabinoxylan rice bran (MGN-3/Biobran) enhances natural killer cell-mediated cytotoxicity against neuroblastoma in vitro and in vivo. *Cytotherapy*, 17(5), 601-612. <https://doi.org/10.1016/j.jcyt.2014.11.001>
- Pescatore, F. M., Přestáno, C., & Kichikova, M. (2022). RBAC and its role with the immune system. *Alternative Therapies in Health and Medicine*, 28(1), 8-10.
- Petrovics, G., Szigeti, G., Hamvas, S., Mate, A., Betlehem, J., & Hegyi, G. (2016). Controlled pilot study for cancer patients suffering from chronic fatigue syndrome due to chemotherapy treated with BioBran (MGN-3Arabinoxylane) and targeted radiofrequency heat therapy. *European Journal of Integrative Medicine*, 8, 29-35. <https://doi.org/10.1016/j.eujim.2016.10.004>
- Salama, H., Medhat, E., Shaheen, M., Zekri, A.-R. N., Darwish, T., & Ghoneum, M. (2016). Arabinoxylan rice bran (Biobran) suppresses the viremia level in patients with chronic HCV infection: A randomized trial. *International Journal of Immunopathology and Pharmacology*, 29(4), 647-653. <https://doi.org/10.1177/0394632016674954>

- Sudo, N., Tatoe, K., Koyama, N., Kanna, H., Hirayama, K., & Kubo, C. (2001). The basic study of alabinoxlan compound (MGN-3) on the activation of vital defence *Rinshou to Kenkyu (Clinical and Research)*, 78(1), 193-196.
- Takahara, K., & Sano, K. (2004). The life prolongation and QOL improvement effect of rice bran arabinoxylan derivative (MGN-3, Biobran) for progressive cancer. *Clinical Pharmacology and Therapy*, 14(3), 267-271.
- Tan, D. F. S., & Flores, J. A. S. (2020). The immunomodulating effects of arabinoxylan rice bran ( Lentin ) on hematologic profile, nutritional status and quality of life among head and neck carcinoma patients undergoing radiation therapy: A double blind randomized control trial. *Radiology Journal, The Official Publication of the Philippine College of Radiology*, 12(February), 11-16.
- Tazawa, K., Ichihashi, K., Fujii, T., Omura, K., Anazawa, M., & Maeda, H. (2003). The oral administration of the Hydrolysis Rice Bran (HRB) prevents a common cold syndrome in elderly people based on immunomodulatory function. *Journal of Traditional Medicines*, 20(3), 132-141.
- Tazawa, K., Namikawa, H., Oida, N., Itoh, K., Yatsuzuka, M., Koike, J., Masada, M., & Maeda, H. (2000). Scavenging activity of MGN-3 (arabinoxylane from rice bran) with natural killer cell activity on free radicals. *Biotherapy: Official journal of Japanese Society of Biological Response Modifiers*, 14(5), 493-495.
- Tsunekawa, H. (2004). Effect of long-term administration of immunomodulatory food on cancer patients completing conventional treatments. *Clinical Pharmacology and Therapy*, 14(3), 295-302.
- University Hospital Medical Information Network Center. (2010). *Radioprotective effects of the Hydrolyzed Rice Bran (HRB) on acute gastroenteritis for cervical cancer treated with chemoradiation*. University hospital Medical Information Network (UMIN) Center. [https://center6.umin.ac.jp/cgi-open-bin/ctr\\_e/ctr\\_view.cgi?recptno=R000005179](https://center6.umin.ac.jp/cgi-open-bin/ctr_e/ctr_view.cgi?recptno=R000005179)
- University Hospital Medical Information Network Center. (2018). *A single center, prospective and randomized controlled study of the efficacy and safety of MGN-3/BioBran for patients with B-cell non-Hodgkin's lymphoma after CR*. University hospital Medical Information Network (UMIN) Center. [https://center6.umin.ac.jp/cgi-open-bin/ctr\\_e/ctr\\_view.cgi?recptno=R000039342](https://center6.umin.ac.jp/cgi-open-bin/ctr_e/ctr_view.cgi?recptno=R000039342)



- Yamada, T., Daizo, A., Boindogurung, K., Egashira, Y., Maeda, H., & Sanada, H. (2002). Effects of enzyme-treated rice bran hemicellulose (MGN-3) on experimental liver injury in rats [Abstract] *Journal of Japanese Association for Dietary Fiber Research*, 6(2), 107-107. <https://doi.org/10.11217/jjdf1997.6.91>
- Yu, K. W., Shin, K. S., Choi, Y. M., & Suh, H. J. (2004). Macrophage stimulating activity of exo-biopolymer from submerged culture of *Lentinus edodes* with rice bran. *Journal of Microbiology and Biotechnology*, 14(4), 658-664.
- Zhao, Z., Cheng, W., Qu, W., & Wang, K. (2020). Arabinoxylan rice bran (MGN-3/Biobran) alleviates radiation-induced intestinal barrier dysfunction of mice in a mitochondrion-dependent manner. *Biomedicine & Pharmacotherapy*, 124, 109855. <https://doi.org/10.1016/j.biopha.2020.109855>
- Zheng, S., Sanada, H., Dohi, H., Hirai, S., & Egashira, Y. (2012a). Suppressive effect of modified arabinoxylan from rice bran (MGN-3) on D-galactosamine-induced IL-18 expression and hepatitis in rats. *Bioscience, Biotechnology, and Biochemistry*, 76(5), 942-946. <https://doi.org/10.1271/bbb.110968>
- Zheng, S., Sugita, S., Hirai, S., & Egashira, Y. (2012b). Protective effect of low molecular fraction of MGN-3, a modified arabinoxylan from rice bran, on acute liver injury by inhibition of NF- $\kappa$ B and JNK/MAPK expression. *International Immunopharmacology*, 14(4), 764-769. <https://doi.org/10.1016/j.intimp.2012.10.012>
- Zhu, X., Okubo, A., Igari, N., Ninomiya, K., & Egashira, Y. (2017). Modified rice bran hemicellulose inhibits vascular endothelial growth factor-induced angiogenesis in vitro via VEGFR2 and its downstream signaling pathways. *Bioscience of Microbiota, Food and Health*, 36(2), 45-53. <https://doi.org/10.12938/bmfh.16-016>

## S5. Additional References

Full citation of all included articles and trial registrations in APA 7<sup>th</sup> format

- Ali, K. H., Melillo, A. B., Leonard, S. M., Asthana, D., Woolger, J. M., Wolfson, A. H., McDaniel, H., & Lewis, J. E. (2012). An open-label, randomized clinical trial to assess the immunomodulatory activity of a novel oligosaccharide compound in healthy adults. *Functional Foods in Health and Disease*, 2(7), 265.
- An, S. Y. (2011). *Immune-enhance and anti-tumor effect of exo-biopolymer extract from submerged culture of Lentinus edodes with rice bran* [Doctoral Thesis, Korea University]. Seoul, Republic of Korea.
- Australian New Zealand Clinical Trials Registry. (2019). *Rice bran arabinoxylan compound and quality of life of cancer patients (RBAC-QoL)*. Australian New Zealand Clinical Trials Registry. Retrieved 2022-12-01 from <https://www.anzctr.org.au/Trial/Registration/TrialReview.aspx?id=377340&isReview=true>
- Badr El-Din, N. K., Abdel Fattah, S. M., Pan, D., Tolentino, L., & Ghoneum, M. (2016a). Chemopreventive activity of MGN-3/Biobran against chemical induction of glandular stomach carcinogenesis in rats and its apoptotic effect in gastric cancer cells. *Integrative Cancer Therapies*, 15(4), NP26-NP34. <https://doi.org/10.1177/1534735416642287>
- Badr El-Din, N. K., Ali, D. A., Alaa El-Dein, M., & Ghoneum, M. (2016b). Enhancing the apoptotic effect of a low dose of paclitaxel on tumor cells in mice by arabinoxylan rice bran (MGN-3/Biobran). *Nutrition and Cancer*, 68(6), 1010-1020. <https://doi.org/10.1080/01635581.2016.1192204>
- Badr El-Din, N. K., Ali, D. A., & Othman, R. M. (2016c). Inhibition of experimental carcinogenesis by the bioactive natural product Biobran. *Journal of Plant Protection and Pathology*, 7(1), 85-91. <https://doi.org/10.21608/jppp.2016.50064>
- Badr El-Din, N. K., Ali, D. A., Othman, R. M., French, S. W., & Ghoneum, M. (2020). Chemopreventive role of arabinoxylan rice bran, MGN-3/Biobran, on liver carcinogenesis in rats. *Biomedicine & Pharmacotherapy*, 126, 110064. <https://doi.org/10.1016/j.biopha.2020.110064>
- Badr El-Din, N. K., Areida, S. K., Ahmed, K. O., & Ghoneum, M. (2019). Arabinoxylan rice bran (MGN-3/Biobran) enhances radiotherapy in animals bearing Ehrlich ascites carcinoma. *Journal of Radiation Research*, 60(6), 747-758. <https://doi.org/10.1093/jrr/rrz055>
- Badr El-Din, N. K., Noaman, E., & Ghoneum, M. (2008). In vivo tumor inhibitory effects of nutritional rice bran supplement MGN-3/Biobran on Ehrlich carcinoma-bearing mice. *Nutrition and Cancer*, 60(2), 235-244. <https://doi.org/10.1080/01635580701627285>

- Bae, M. J., Lee, S. T., Chae, S. Y., Shin, S. H., Kwon, S. H., Park, M. H., Song, M. Y., & Hwang, S. J. (2004). The effects of the arabinoxylane and the polysaccharide peptide (PSP) on the antiallergy, anticancer. *Journal of the Korean Society of Food Science and Nutrition*, 33(3), 469-474. <https://doi.org/10.3746/jkfn.2004.33.3.469>
- Bang, M. H., Tran, V. R., Thinh, N. T., Song, L. H., Dung, T. T., Le, V. T., Le, V. D., Ky, T. D., Pan, D., Shaheen, M., & Ghoneum, M. (2010). Arabinoxylan rice bran (MGN-3) enhances the effects of interventional therapies for the treatment of hepatocellular carcinoma: a three-year randomized clinical trial. *Anticancer Research*, 30(12), 5145-5151.
- Brush, T. P., Trinh, S., Brawner, C. M., Ali, K. H., Hauke, R. J., & Elkahwaji, J. E. (2010). RBAC, a modified form of Arabinoxylan from rice bran, impairs prostate cancer cell line proliferation, adhesion, and invasion in vitro [Abstract]. *Cancer Research*, 70(8), 5662-5662. <https://doi.org/10.1158/1538-7445.AM10-5662>
- Cadden, J. J., Loomis, K. A., Kallia, R., Louie, S., & Dube, M. P. (2020). Anti-inflammatory effects of arabinoxylan rice bran supplementation in participants with treated, suppressed HIV infection and inadequate immune reconstitution: a randomized, doubleblind trial [Abstract]. *Antiviral Therapy*, 25(Suppl 1), A26.
- Chae, S. Y., Shin, S. H., Bae, M. J., Park, M. H., Song, M. K., Hwang, S. J., & Yee, S. T. (2004). Effect of arabinoxylane and PSP on activation of immune cells. *Journal of the Korean Society of Food Science and Nutrition*, 33(2), 278-286. <https://doi.org/10.3746/jkfn.2004.33.2.278>
- Choi, J. Y., Paik, D. J., Kwon, D. Y., & Park, Y. (2014). Dietary supplementation with rice bran fermented with *Lentinus edodes* increases interferon- $\gamma$  activity without causing adverse effects: a randomized, double-blind, placebo-controlled, parallel-group study. *Nutrition Journal*, 13, 35. <https://doi.org/10.1186/1475-2891-13-35>
- Cholujova, D., Jakubikova, J., Czako, B., Martisova, M., Hunakova, L., Duraj, J., Mistrik, M., & Sedlak, J. (2013). MGN-3 arabinoxylan rice bran modulates innate immunity in multiple myeloma patients. *Cancer Immunology, Immunotherapy*, 62(3), 437-445. <https://doi.org/10.1007/s00262-012-1344-z>
- Cholujova, D., Jakubikova, J., & Sedlak, J. (2009). BioBran-augmented maturation of human monocyte-derived dendritic cells. *Neoplasma*, 56(2), 89-95. [https://doi.org/10.4149/neo\\_2009\\_02\\_89](https://doi.org/10.4149/neo_2009_02_89)
- Chung, W. S., Wang, J. H., Bose, S., Park, J. M., Park, S. O., Lee, S. J., Jeon, S., & Kim, H. (2015). Hepatoprotective effect of *Lentinus edodes* mycelia fermented formulation against alcoholic liver injury in rats. *Journal of Food Biochemistry*, 39(3), 251-262. <https://doi.org/10.1111/jfbc.12124>
- Clinical Research Information Service. (2012). *Effects of ingestion of fermented rice bran powder on immune function in healthy adults*. Clinical Research Information Service (CRiS) of Republic of Korea <https://cris.nih.go.kr/cris/search/listDetail.do?searchWord=KCT0000536>

- Clinical Research Information Service. (2018). *A 8 week, randomized, double-blind, Placebo-controlled clinical trial of RB-F for the evaluation of efficacy and safety on immune function*. Clinical Research Information Service (CRiS) of Republic of Korea  
<https://cris.nih.go.kr/cris/search/listDetail.do?searchWord=KCT0002646>
- ClinicalTrials.gov. (2009). *Arabinoxylan rice bran (MGN-3/Biobran) for the treatment of hepatocellular carcinoma and hepatitis B and C infection*. National Library of Medicine (US).  
<https://clinicaltrials.gov/show/NCT01018381>
- ClinicalTrials.gov. (2013). *Enhanced natural killer cell activity and RBAC*. National Library of Medicine (US). <https://clinicaltrials.gov/show/NCT02019628>
- ClinicalTrials.gov. (2014). *The effect of an enhanced rice bran nutritional supplement in HIV(BRM4)*. National Library of Medicine (US). <https://clinicaltrials.gov/ct2/show/NCT02214173>
- ClinicalTrials.gov. (2015). *The effect of an RBAC supplement (BRM4) on NAFLD*. National Library of Medicine (US). <https://clinicaltrials.gov/show/NCT02568787>
- ClinicalTrials.gov. (2016a). *Response modifier (arabinoxylan rice bran/mgn-3/biobran) with interferon-alpha for for HCV*. National Library of Medicine (US).  
<https://clinicaltrials.gov/show/NCT02690103>
- ClinicalTrials.gov. (2016b). *Rice bran supplementation in treated HIV infection*. National Library of Medicine (US). <https://clinicaltrials.gov/show/NCT02922907>
- ClinicalTrials.gov. (2020). *Biobran/MGN-3 increases innate resistance and reduces the incidence of influenza-like illnesses*. National Library of Medicine (US).  
<https://clinicaltrials.gov/show/NCT04646980>
- Current Controlled Trials. (2017). *Trial of the functional food Biobran in patients with persistent symptoms attributed to Lyme borreliosis*. BioMed Central.  
<https://www.isrctn.com/ISRCTN31318565>
- Daizo, A., Yamada, T., Egashira, Y., Maeda, H., Ohta, T., & Sanada, H. (2001). Effect of enzymatically treated rice bran hemicellulose (MGN-3) on experimental galactosamine liver injury in rats [Abstract]. *Journal of Japanese Association for Dietary Fiber Research*, 5(2), 48-48.  
[https://doi.org/10.11217/jjdf1997.5.2\\_43](https://doi.org/10.11217/jjdf1997.5.2_43)
- Egashira, Y., Hanaki, M., Hirai, S., Zhu, X., & Igari, N. (2013). Suppressive effect of hydrolyzed rice bran (HRB) on D-galactosamine/ LPS induced IL-18 and hepatitis by inhibition of NF-kappa B pathway in mice [Abstract]. *Annals of Nutrition and Metabolism*, 63(Suppl 1), 1700-1701.  
<https://doi.org/10.1159/000354245>

- Elsaid, A. F., Agrawal, S., Agrawal, A., & Ghoneum, M. (2021). Dietary supplementation with Biobran/MGN-3 increases innate resistance and reduces the incidence of influenza-like illnesses in elderly subjects: a randomized, double-blind, placebo-controlled pilot clinical trial. *Nutrients*, 13(11). <https://doi.org/10.3390/nu13114133>
- Elsaid, A. F., Fahmi, R. M., Shaheen, M., & Ghoneum, M. (2020). The enhancing effects of Biobran/MGN-3, an arabinoxylan rice bran, on healthy old adults' health-related quality of life: a randomized, double-blind, placebo-controlled clinical trial. *Quality of Life Research*, 29(2), 357-367. <https://doi.org/10.1007/s11136-019-02286-7>
- Elsaid, A. F., Shaheen, M., & Ghoneum, M. (2018). Biobran/MGN-3, an arabinoxylan rice bran, enhances NK cell activity in geriatric subjects: A randomized, double-blind, placebo-controlled clinical trial. *Experimental and Therapeutic Medicine*, 15(3), 2313-2320. <https://doi.org/10.3892/etm.2018.5713>
- Endo, Y., & Kanbayashi, H. (2003). Modified rice bran beneficial for weight loss of mice as a major and acute adverse effect of cisplatin. *Pharmacology and Toxicology*, 92(6), 300-303. <https://doi.org/10.1034/j.1600-0773.2003.920608.x>
- Ghoneum, M. (1998a). Anti-HIV activity in vitro of MGN-3, an activated arabinoxylane from rice bran. *Biochemical and Biophysical Research Communications*, 243(1), 25-29.
- Ghoneum, M. (1998b). Enhancement of human natural killer cell activity by modified arabinoxylane from rice bran (MGN-3). *International Journal of Immunotherapy*, 14(2), 89-99.
- Ghoneum, M. (1999, Dec 11-13). *Immunostimulation and cancer prevention* [Abstract]. 7th International Congress on Anti-Aging & Biomedical Technologies, Las Vegas, NV, USA.
- Ghoneum, M., & Abedi, S. (2004). Enhancement of natural killer cell activity of aged mice by modified arabinoxylan rice bran (MGN-3/Biobran). *Journal of Pharmacy and Pharmacology*, 56(12), 1581-1588. <https://doi.org/10.1211/0022357044922>
- Ghoneum, M., & Agrawal, S. (2011). Activation of human monocyte-derived dendritic cells in vitro by the biological response modifier arabinoxylan rice bran (MGN-3/Biobran). *International Journal of Immunopathology and Pharmacology*, 24(4), 941-948. <https://doi.org/10.1177/039463201102400412>
- Ghoneum, M., & Agrawal, S. (2014). MGN-3/biobran enhances generation of cytotoxic CD8+ T cells via upregulation of DEC-205 expression on dendritic cells. *International Journal of Immunopathology and Pharmacology*, 27(4), 523-530. <https://doi.org/10.1177/039463201402700408>
- Ghoneum, M., Badr El-Din, N. K., Abdel Fattah, S. M., & Tolentino, L. (2013). Arabinoxylan rice bran (MGN-3/Biobran) provides protection against whole-body gamma -irradiation in mice via

- restoration of hematopoietic tissues. *Journal of Radiation Research*, 54(3), 419-429. <https://doi.org/10.1093/jrr/rrs119>
- Ghoneum, M., Badr El-Din, N. K., Ali, D. A., & Alaa El-Dein, M. (2014). Modified arabinoxylan from rice bran, MGN-3/Biobran, sensitizes metastatic breast cancer cells to paclitaxel in vitro. *Anticancer Research*, 34(1A), 81-87.
- Ghoneum, M., & Brown, J. (1999). NK Immunorestitution and cancer patients by MGN-3, a modified arabinoxylan rice bran (Study of 32 patients followed for up to 4 years). In R. M. Klatz & R. Goldman (Eds.), *Anti-aging Medical Therapeutics* (Vol. III, pp. 217-226). Health Quest Publications.
- Ghoneum, M., & El Sayed, N. S. (2021). Protective effect of Biobran/MGN-3 against sporadic Alzheimer's disease mouse model: possible role of oxidative stress and apoptotic pathways. *Oxidative Medicine and Cellular Longevity*, 2021. <https://doi.org/10.1155/2021/8845064>
- Ghoneum, M., & Gollapudi, S. (2003). Modified arabinoxylan rice bran (MGN-3/Biobran) sensitizes human T cell leukemia cells to death receptor (CD95)-induced apoptosis. *Cancer Letters*, 201(1), 41-49. [https://doi.org/10.1016/s0304-3835\(03\)00458-0](https://doi.org/10.1016/s0304-3835(03)00458-0)
- Ghoneum, M., & Gollapudi, S. (2005a). Modified arabinoxylan rice bran (MGN-3/Biobran) enhances yeast-induced apoptosis in human breast cancer cells in vitro. *Anticancer Research*, 25(2a), 859-870.
- Ghoneum, M., & Gollapudi, S. (2005b). Synergistic role of arabinoxylan rice bran (MGN-3/Biobran) in *S. cerevisiae*-induced apoptosis of monolayer breast cancer MCF-7 cells. *Anticancer Research: International Journal of Cancer Research and Treatment*, 25(6b), 4187-4196.
- Ghoneum, M., & Gollapudi, S. (2011). Synergistic apoptotic effect of arabinoxylan rice bran (MGN-3/Biobran) and curcumin (turmeric) on human multiple myeloma cell line U266 in vitro. *Neoplasia*, 58(2), 118-123. [https://doi.org/10.4149/neo\\_2011\\_02\\_118](https://doi.org/10.4149/neo_2011_02_118)
- Ghoneum, M., & Jewett, A. (2000). Production of tumor necrosis factor-alpha and interferon-gamma from human peripheral blood lymphocytes by MGN-3, a modified arabinoxylan from rice bran, and its synergy with interleukin-2 in vitro. *Cancer Detection and Prevention*, 24(4), 314-324.
- Ghoneum, M., & Matsuura, M. (2004). Augmentation of macrophage phagocytosis by modified arabinoxylan rice bran (MGN-3/biobran). *International Journal of Immunopathology and Pharmacology*, 17(3), 283-292. <https://doi.org/10.1177/039463200401700308>
- Ghoneum, M., Matsuura, M., & Gollapudi, S. (2008). Modified arabinoxylan rice bran (MGN-3/Biobran) enhances intracellular killing of microbes by human phagocytic cells in vitro. *International Journal of Immunopathology and Pharmacology*, 21(1), 87-95. <https://doi.org/10.1177/039463200802100110>

- Ghoneum, M., Tachiki, K. H., Ueyama, K., Makinodan, T., Makhijani, N., & Yamaguchi, D. (2000, Dec 14-17). *Natural biological response modifier (MGN-3) shown to be effective against tumor cell growth* [Abstract]. 8th International Congress on Anti-Aging & Biomedical Technologies, Las Vegas, NV, USA.
- Giese, S., Sabell, G. R., & Coussons-Read, M. (2008). Impact of ingestion of rice bran and shitake mushroom extract on lymphocyte function and cytokine production in healthy rats. *Journal of Dietary Supplements*, 5(1), 47-61. <https://doi.org/10.1080/19390210802329196>
- Gollapudi, S., & Ghoneum, M. (2008). MGN-3/Biobran, modified arabinoxylan from rice bran, sensitizes human breast cancer cells to chemotherapeutic agent, daunorubicin. *Cancer Detection and Prevention*, 32(1), 1-6. <https://doi.org/10.1016/j.cdp.2008.02.006>
- Golombick, T., Diamond, T. H., Manoharan, A., & Ramakrishna, R. (2016). Addition of rice bran arabinoxylan to curcumin therapy may be of benefit to patients with early-stage B-cell lymphoid malignancies (monoclonal gammopathy of undetermined significance, smoldering multiple myeloma, or stage 0/1 chronic lymphocytic leukemia). *Integrative Cancer Therapies*, 15(2), 183-189. <https://doi.org/10.1177/1534735416635742>
- Hajtó, T. (2017). Can a standardized plant immunomodulator (rice bran arabinoxylan concentrate/MGN-3) increase the effects of MEK and BRAF inhibitors with clinical benefit? Case report of a patient with carcinoma in biliary duct. *Research and Review Insights*, 1(3), 1-4. <https://doi.org/10.15761/rri.1000115>
- Hajtó, T. (2018). New perspectives to improve the MHC-I unrestricted immune mechanisms against malignant tumors. *Advances in Clinical and Translational Research*, 2(3), 100014.
- Hajtó, T., Baranyai, L., Kirsch, A., Kuzma, M., & Perjési, P. (2015). Can a synergistic activation of pattern recognition receptors by plant immunomodulators enhance the effect of oncologic therapy? Case Report of a patient with uterus and ovary sarcoma. *Clinical Case Reports and Reviews*, 1(10), 235-238. <https://doi.org/10.15761/CCRR.1000176>
- Hajtó, T., Horváth, A., Baranyai, L., Kuzma, M., & Perjési, P. (2016a). Can the EGFR inhibitors increase the immunomodulatory effects of standardized plant extracts (mistletoe lectin and arabonoxylan) with clinical benefit? Case report of a patient with lung adenocarcinoma. *Clinical Case Reports and Reviews*, 2(6), 456-459. <https://doi.org/10.15761/CCRR.1000244>
- Hajtó, T., Horváth, A., & Papp, S. (2016b). Improvement of quality of life in tumor patients after an immunomodulatory treatment with standardized mistletoe lectin and arabinoxylan plant extracts. *International Journal of Neurorehabilitation*, 3(2), 2-4. <https://doi.org/10.4172/2376-0281.1000205>

- Hajtó, T., & Kirsch, A. (2013). Case reports of cancer patients with hepatic metastases treated by standardized plant immunomodulatory preparations. *Journal of Cancer Research Updates*, 2(1), 1-9. <https://doi.org/10.6000/1929-2279.2013.02.01.1>
- Hoshino, Y., Hirashima, N., Nakanishi, M., & Furuno, T. (2010). Inhibition of degranulation and cytokine production in bone marrow-derived mast cells by hydrolyzed rice bran. *Inflammation Research*, 59(8), 615-625. <https://doi.org/10.1007/s00011-010-0173-9>
- Ichihashi, K. (2004). Experience with administration of BioBran in patients with chronic rheumatism. *Clinical Pharmacology and Therapy*, 14(4), 459-463.
- Itoh, Y., Mizuno, M., Ikeda, M., Nakahara, R., Kubota, S., Ito, J., Okada, T., Kawamura, M., Kikkawa, F., & Naganawa, S. (2015). A randomized, double-blind pilot trial of hydrolyzed rice bran versus placebo for radioprotective effect on acute gastroenteritis secondary to chemoradiotherapy in patients with cervical cancer. *Evidence-based Complementary and Alternative Medicine*, 974390-974390. <https://doi.org/10.1155/2015/974390>
- Jacoby, H. I., Wnorowski, G., Sakata, K., & Maeda, H. (2001). The effect of MGN-3 on cisplatin and doxorubicin induced toxicity in the rat. *Journal of Nutraceuticals, Functional & Medical Foods*, 3(4), 3-11. [https://doi.org/10.1300/J133v03n04\\_02](https://doi.org/10.1300/J133v03n04_02)
- Kaketani, K. (2004). A case where an immunomodulatory food was effective in conservative therapy for progressive terminal pancreatic cancer. *Clinical Pharmacology and Therapy*, 14(3), 273-279.
- Kambayashi, H., & Endo, Y. (2002). Evaluation of the effects of asthma prevention and symptom reduction by enzymatically modified rice-bran foods in asthmatic model mice [Abstract] *Japanese Journal of Allergology*, 51(9/10), 957-957. [https://doi.org/10.15036/areruigi.51.957\\_3](https://doi.org/10.15036/areruigi.51.957_3)
- Kamiya, T., Shikano, M., Tanaka, M., Ozeki, K., Ebi, M., Katano, T., Hamano, S., Nishiwaki, H., Tsukamoto, H., Mizoshita, T., Mori, Y., Kubota, E., Tanida, S., Kataoka, H., Okuda, N., & Joh, T. (2014). Therapeutic effects of Biobran, modified arabinoxylan rice bran, in improving symptoms of diarrhea predominant or mixed type irritable bowel syndrome: a pilot, randomized controlled study. *Evidence-Based Complementary and Alternative Medicine*, 2014. <https://doi.org/10.1155/2014/828137>
- Kang, S. J., Yang, H. Y., Lee, S. J., Kim, J. H., Hwang, S. J., & Hong, S. G. (2022). Immunostimulatory effect of rice bran fermented by *Lentinus edodes* mycelia on mouse macrophages and splenocytes. *Journal of the Korean Society of Food Science and Nutrition*, 51(8), 743-750. <https://doi.org/10.3746/jkfn.2022.51.8.743>
- Kawai, T. (2004). One case of a patient with umbilical metastasis of recurrent cancer (Sister Mary Joseph's Nodule, SMJN) who has survived for a long time under immunomodulatory supplement therapy. *Clinical Pharmacology and Therapy*, 14(3), 281-288.



- Kenyon, J. (2001, Nov). A descriptive questionnaire-based study on the use of Biobran (MGN3), in chronic fatigue syndrome. *Townsend Letter for Doctors and Patients*, (220), 48-50.
- Kim, D. J., Choi, S. M., Kim, H. Y., Kim, J. H., Ryu, S. N., Han, S. J., & Hong, S. G. (2011a). Evaluation of biological activities of fermented rice bran from novel black colored rice cultivar SuperC3GHi. *Korean Journal of Crop Science*, 56(4), 420-426.
- Kim, D. J., Ryu, S.-N., Han, S. J., Kim, H. Y., Kim, J. H., & Hong, S. G. (2011b). In vivo immunological activity in fermentation with black rice bran. *The Korean Journal of Food And Nutrition*, 24(3), 273-281. <https://doi.org/10.9799/KSFAN.2011.24.3.273>
- Kim, H. Y., Han, J. T., Hong, S. G., Yang, S. B., Hwang, S. J., Shin, K. S., Suh, H. J., & Park, M. H. (2005). Enhancement of immunological activity in exo-biopolymer from submerged culture of *Lentinus edodes* with rice bran. *Natural Product Sciences*, 11(3), 183-187.
- Kim, H. Y., Kim, J. H., Yang, S. B., Hong, S. G., Lee, S. A., Hwang, S. J., Shin, K. S., Suh, H. J., & Park, M. H. (2007). A polysaccharide extracted from rice bran fermented with *Lentinus edodes* enhances natural killer cell activity and exhibits anticancer effects. *Journal of Medicinal Food*, 10(1), 25-31. <https://doi.org/10.1089/jmf.2006.116>
- Kim, J. M., Hong, S. G., Song, B. S., Sohn, H. J., Baik, H., & Sung, M. K. (2020). Efficacy of cereal-based oral nutrition supplement on nutritional status, inflammatory cytokine secretion and quality of life in cancer patients under cancer therapy. *Journal of Cancer Prevention*, 25(1), 55-63. <https://doi.org/10.15430/JCP.2020.25.1.55>
- Kim, S. P., Lee, S. J., Nam, S. H., & Friedman, M. (2018). The composition of a bioprocessed shiitake (*Lentinus edodes*) mushroom mycelia and rice bran formulation and its antimicrobial effects against *Salmonella enterica* subsp. *enterica* serovar Typhimurium strain SL1344 in macrophage cells and in mice. *BMC Complementary and Alternative Medicine*, 18(1). <https://doi.org/10.1186/s12906-018-2365-8>
- Kim, S. P., Park, S. O., Lee, S. J., Nam, S. H., & Friedman, M. (2013). A polysaccharide isolated from the liquid culture of *Lentinus edodes* (Shiitake) mushroom mycelia containing black rice bran protects mice against a *Salmonella* lipopolysaccharide-induced endotoxemia. *Journal of Agricultural and Food Chemistry*, 61(46), 10987-10994. <https://doi.org/10.1021/jf403173k>
- Kim, S. P., Park, S. O., Lee, S. J., Nam, S. H., & Friedman, M. (2014). A polysaccharide isolated from the liquid culture of *Lentinus edodes* (Shiitake) mushroom mycelia containing black rice bran protects mice against salmonellosis through upregulation of the Th1 immune reaction. *Journal of Agricultural and Food Chemistry*, 62(11), 2384-2391. <https://doi.org/10.1021/jf405223q>
- Lewis, J. E., Atlas, S. E., Abbas, M. H., Rasul, A., Farooqi, A., Lantigua, L. A., Michaud, F., Goldberg, S., Lages, L. C., Gao, J., Higuera, O. L., Fiallo, A., Harvey, P. D., Tiozzo, E., Woolger, J. M., Ciraula, S., Mendez, A., Rodriguez, A. E., & Konefal, J. (2020a). Cardiovascular, endothelial function,

- and immune markers in response to treatment with a polysaccharide in HIV(+) adults in a randomized, double-blind placebo-controlled trial. *Journal of Clinical and Translational Research*, 5(3), 140-147.
- Lewis, J. E., Atlas, S. E., Abbas, M. H., Rasul, A., Farooqi, A., Lantigua, L. A., Michaud, F., Goldberg, S., Lages, L. C., Higuera, O. L., Fiallo, A., Tiozzo, E., Woolger, J. M., Ciraula, S., Mendez, A., Rodriguez, A. E., & Konefal, J. (2020b). The novel effects of a hydrolyzed polysaccharide dietary supplement on immune, hepatic, and renal function in adults with HIV in a randomized, double-blind, placebo-control trial. *Journal of Dietary Supplements*, 17(4), 429-441. <https://doi.org/10.1080/19390211.2019.1619010>
- Lewis, J. E., Atlas, S. E., Higuera, O. L., Fiallo, A., Rasul, A., Farooqi, A., Kromo, O., Lantigua, L. A., Tiozzo, E., Woolger, J. M., Goldberg, S., Mendez, A., Rodriguez, A. E., & Konefal, J. (2020c). Corrigendum to “The Effect of a Hydrolyzed Polysaccharide Dietary Supplement on Biomarkers in Adults with Nonalcoholic Fatty Liver Disease”. *Evidence-Based Complementary and Alternative Medicine*, 2020, 10. <https://doi.org/10.1155/2020/9575878>
- Lissoni, P., Messina, G., Brivio, F., Fumagalli, L., Rovelli, F., Maruelli, L., Miceli, M., Marchiori, P., Porro, G., Held, M., Fede, G., & Uchiyamada, T. (2008). Modulation of the anticancer immunity by natural agents: inhibition of T regulatory lymphocyte generation by arabinoxylan in patients with locally limited or metastatic solid tumors. *Cancer Therapy*, 6(2), 1011-1016.
- Markus, J., Miller, A., Smith, M., & Orengo, I. (2006). Metastatic hemangiopericytoma of the skin treated with wide local excision and MGN-3. *Dermatologic Surgery*, 32(1), 145-147. <https://doi.org/10.1111/1524-4725.2006.32023>
- Masood, A. I., Sheikh, R., & Anwer, R. A. (2013). “BIOBRAN MGN-3”; Effect of reducing side effects of chemotherapy in breast cancer patients. *The Professional Medical Journal*, 20(1), 13-16.
- McDermott, C., Richards, S. C., Thomas, P. W., Montgomery, J., & Lewith, G. (2006). A placebo-controlled, double-blind, randomized controlled trial of a natural killer cell stimulant (BioBran MGN-3) in chronic fatigue syndrome. *QJM: An International Journal of Medicine*, 99(7), 461-468. <https://doi.org/10.1093/qjmed/hcl063>
- Meshitsuka, K. (2013). A case of stage IV hepatocellular carcinoma treated by KM900, Biobran, and psychotherapy has presented significant good results. *Personalized Medicine Universe (Japanese Edition )*, 1(1), 46-48.
- Miura, T., Chiba, M., Miyazaki, Y., Kato, Y., & Maeda, H. (2004/2013). Chemical structure of the component involved in immunoregulation. In *BioBran/MGN-3 (Rice Bran Arabinoxylan Coumpound): Basic and clinical application to integrative medicine* (2nd ed., pp. 14-22). BioBran Research Foundation. (Reprinted from a report of 2004 Annual Meeting of the Japanese society of Applied Glycoscience.)

- Noaman, E., Badr El-Din, N. K., Bibars, M. A., Abou Mossallam, A. A., & Ghoneum, M. (2008). Antioxidant potential by arabinoxylan rice bran, MGN-3/biobran, represents a mechanism for its oncostatic effect against murine solid Ehrlich carcinoma. *Cancer Letters*, 268(2), 348-359. <https://doi.org/10.1016/j.canlet.2008.04.012>
- Ohara, I., Onai, K., & Maeda, H. (2002). Modified rice bran improves glucose tolerance in NIDDM adult rats given streptozotocin as neonates. *Aichi Gakusen University Research Studies*, 37, 17-23.
- Ohara, I., Tabuchi, R., & Onai, K. (2000). Effects of modified rice bran on serum lipids and taste preference in streptozotocin-induced diabetic rats. *Nutrition research*, 20(1), 59-68. [https://doi.org/10.1016/S0271-5317\(99\)00138-4](https://doi.org/10.1016/S0271-5317(99)00138-4)
- Okamura, Y. (2004). The clinical significance of Biobran in the immunotherapy for cancer. *Clinical Pharmacology and Therapy*, 14(3), 289-294.
- Ooi, S. L., Pak, S. C., Micalos, P. S., Schupfer, E., Zielinski, R., Jeffries, T., Harris, G., Golombick, T., & McKinnon, D. (2020). Rice bran arabinoxylan compound and quality of life of cancer patients (RBAC-QoL): Study protocol for a randomized pilot feasibility trial. *Contemporary Clinical Trials Communications*, 19, 100580. <https://doi.org/10.1016/j.conctc.2020.100580>
- Pérez-Martínez, A., Valentín, J., Fernández, L., Hernández-Jiménez, E., López-Collazo, E., Zerbes, P., Schwörer, E., Nuñez, F., Martín, I. G., Sallis, H., Díaz, M. Á., Handgretinger, R., & Pfeiffer, M. M. (2015). Arabinoxylan rice bran (MGN-3/Biobran) enhances natural killer cell-mediated cytotoxicity against neuroblastoma in vitro and in vivo. *Cytotherapy*, 17(5), 601-612. <https://doi.org/10.1016/j.jcyt.2014.11.001>
- Pescatore, F. M., Přestáno, C., & Kichikova, M. (2022). RBAC and its role with the immune system. *Alternative Therapies in Health and Medicine*, 28(1), 8-10.
- Petrovics, G., Szigeti, G., Hamvas, S., Mate, A., Betlehem, J., & Hegyi, G. (2016). Controlled pilot study for cancer patients suffering from chronic fatigue syndrome due to chemotherapy treated with BioBran (MGN-3Arabinoxylane) and targeted radiofrequency heat therapy. *European Journal of Integrative Medicine*, 8, 29-35. <https://doi.org/10.1016/j.eujim.2016.10.004>
- Salama, H., Medhat, E., Shaheen, M., Zekri, A.-R. N., Darwish, T., & Ghoneum, M. (2016). Arabinoxylan rice bran (Biobran) suppresses the viremia level in patients with chronic HCV infection: A randomized trial. *International Journal of Immunopathology and Pharmacology*, 29(4), 647-653. <https://doi.org/10.1177/0394632016674954>
- Sudo, N., Tatoe, K., Koyama, N., Kanna, H., Hirayama, K., & Kubo, C. (2001). The basic study of alabinoxlan compound (MGN-3) on the activation of vital defence *Rinshou to Kenkyu (Clinical and Research)*, 78(1), 193-196.

- Takahara, K., & Sano, K. (2004). The life prolongation and QOL improvement effect of rice bran arabinoxylan derivative (MGN-3, Biobran) for progressive cancer. *Clinical Pharmacology and Therapy*, 14(3), 267-271.
- Tan, D. F. S., & Flores, J. A. S. (2020). The immunomodulating effects of arabinoxylan rice bran ( Lentin ) on hematologic profile, nutritional status and quality of life among head and neck carcinoma patients undergoing radiation therapy: A double blind randomized control trial. *Radiology Journal, The Official Publication of the Philippine College of Radiology*, 12(February), 11-16.
- Tazawa, K., Ichihashi, K., Fujii, T., Omura, K., Anazawa, M., & Maeda, H. (2003). The oral administration of the Hydrolysis Rice Bran (HRB) prevents a common cold syndrome in elderly people based on immunomodulatory function. *Journal of Traditional Medicines*, 20(3), 132-141.
- Tazawa, K., Namikawa, H., Oida, N., Itoh, K., Yatsuzuka, M., Koike, J., Masada, M., & Maeda, H. (2000). Scavenging activity of MGN-3 (arabinoxylane from rice bran) with natural killer cell activity on free radicals. *Biotherapy: Official journal of Japanese Society of Biological Response Modifiers*, 14(5), 493-495.
- Tsunekawa, H. (2004). Effect of long-term administration of immunomodulatory food on cancer patients completing conventional treatments. *Clinical Pharmacology and Therapy*, 14(3), 295-302.
- University Hospital Medical Information Network Center. (2010). *Radioprotective effects of the Hydrolyzed Rice Bran (HRB) on acute gastroenteritis for cervical cancer treated with chemoradiation*. University hospital Medical Information Network (UMIN) Center. [https://center6.umin.ac.jp/cgi-open-bin/ctr\\_e/ctr\\_view.cgi?recptno=R000005179](https://center6.umin.ac.jp/cgi-open-bin/ctr_e/ctr_view.cgi?recptno=R000005179)
- University Hospital Medical Information Network Center. (2018). *A single center, prospective and randomized controlled study of the efficacy and safety of MGN-3/BioBran for patients with B-cell non-Hodgkin's lymphoma after CR*. University hospital Medical Information Network (UMIN) Center. [https://center6.umin.ac.jp/cgi-open-bin/ctr\\_e/ctr\\_view.cgi?recptno=R000039342](https://center6.umin.ac.jp/cgi-open-bin/ctr_e/ctr_view.cgi?recptno=R000039342)
- Yamada, T., Daizo, A., Boindogurung, K., Egashira, Y., Maeda, H., & Sanada, H. (2002). Effects of enzyme-treated rice bran hemicellulose (MGN-3) on experimental liver injury in rats [Abstract] *Journal of Japanese Association for Dietary Fiber Research*, 6(2), 107-107. <https://doi.org/10.11217/jjdf1997.6.91>
- Yu, K. W., Shin, K. S., Choi, Y. M., & Suh, H. J. (2004). Macrophage stimulating activity of exo-biopolymer from submerged culture of *Lentinus edodes* with rice bran. *Journal of Microbiology and Biotechnology*, 14(4), 658-664.
- Zhao, Z., Cheng, W., Qu, W., & Wang, K. (2020). Arabinoxylan rice bran (MGN-3/Biobran) alleviates radiation-induced intestinal barrier dysfunction of mice in a mitochondrion-dependent

manner. *Biomedicine & Pharmacotherapy*, 124, 109855.  
<https://doi.org/10.1016/j.biopha.2020.109855>

Zheng, S., Sanada, H., Dohi, H., Hirai, S., & Egashira, Y. (2012a). Suppressive effect of modified arabinoxylan from rice bran (MGN-3) on D-galactosamine-induced IL-18 expression and hepatitis in rats. *Bioscience, Biotechnology, and Biochemistry*, 76(5), 942-946.  
<https://doi.org/10.1271/bbb.110968>

Zheng, S., Sugita, S., Hirai, S., & Egashira, Y. (2012b). Protective effect of low molecular fraction of MGN-3, a modified arabinoxylan from rice bran, on acute liver injury by inhibition of NF-[kappa]B and JNK/MAPK expression. *International Immunopharmacology*, 14(4), 764-769.  
<https://doi.org/10.1016/j.intimp.2012.10.012>

Zhu, X., Okubo, A., Igari, N., Ninomiya, K., & Egashira, Y. (2017). Modified rice bran hemicellulose inhibits vascular endothelial growth factor-induced angiogenesis in vitro via VEGFR2 and its downstream signaling pathways. *Bioscience of Microbiota, Food and Health*, 36(2), 45-53.  
<https://doi.org/10.12938/bmfh.16-016>
